# Supplementary material for: Exploiting Protein-Protein Interaction Networks for Genome-Wide Disease-Gene Prioritization
Source: PLoS One. 2012 Sep 21;7(9):e43557. doi: 10.1371/journal.pone.0043557 (PMC3448640; doi:10.1371/journal.pone.0043557)
Supplement: Table S4 — Sensitivity values at top 1% predictions of the prioritization methods for each disorder and network. (XLS) [file pone.0043557.s008.xls]

## Sheet: Goh
	NetScore	NetZcore	NetShort	Func. Flow	PageRank	Random walk	Network propagation	NetCombo (NetScore + NetZcore + NetShort)	NetScore + NetZcore + NetShort + Network Propogation	All 7	NetScore + Network Propogation
chen_atherosclerosis	6.67 (8.16)	10.00 (13.33)	16.67 (14.91)	10.00 (13.33)	3.33 (6.67)	3.33 (6.67)	3.33 (6.67)	16.67 (21.08)	16.67 (21.08)	16.67 (21.08)	3.33 (6.67)
chen_autism	4.00 (8.00)	8.00 (9.80)	16.00 (14.97)	12.00 (16.00)	0.00 (0.00)	4.00 (8.00)	12.00 (16.00)	16.00 (14.97)	16.00 (14.97)	16.00 (14.97)	4.00 (8.00)
chen_cervical_carcinoma	9.52 (7.82)	3.33 (6.67)	2.86 (5.71)	9.05 (11.70)	5.71 (11.43)	9.05 (11.70)	12.86 (6.49)	3.33 (6.67)	3.33 (6.67)	6.19 (7.62)	12.38 (11.00)
chen_cirrhosis	9.00 (11.14)	0.00 (0.00)	14.00 (11.58)	9.00 (11.14)	5.00 (10.00)	5.00 (10.00)	5.00 (10.00)	9.00 (11.14)	9.00 (11.14)	9.00 (11.14)	9.00 (11.14)
chen_endometrial_carcinoma	12.38 (12.27)	11.90 (10.86)	17.14 (14.00)	14.76 (9.09)	14.29 (12.78)	14.76 (9.09)	17.62 (10.61)	6.19 (7.62)	9.05 (7.44)	11.90 (10.86)	18.10 (11.82)
chen_endometriosis	0.00 (0.00)	0.00 (0.00)	10.36 (5.22)	5.00 (6.12)	5.36 (6.59)	2.50 (5.00)	0.00 (0.00)	0.00 (0.00)	0.00 (0.00)	0.00 (0.00)	0.00 (0.00)
chen_epilepsy	15.33 (14.85)	11.33 (15.72)	8.00 (9.80)	23.33 (19.78)	4.00 (8.00)	4.00 (8.00)	15.33 (14.85)	19.33 (12.72)	19.33 (12.72)	23.33 (19.78)	15.33 (14.85)
chen_graves_disease	2.86 (5.71)	0.00 (0.00)	2.86 (5.71)	8.57 (7.00)	2.86 (5.71)	5.71 (7.00)	11.43 (5.71)	0.00 (0.00)	2.86 (5.71)	2.86 (5.71)	2.86 (5.71)
chen_hypercholesterolaemia	31.67 (24.38)	31.67 (24.38)	41.67 (24.72)	41.67 (24.72)	15.00 (12.25)	20.00 (18.71)	41.67 (24.72)	41.67 (24.72)	41.67 (24.72)	41.67 (24.72)	36.67 (25.06)
chen_inflammatory_bowel_disease	6.67 (13.33)	10.00 (13.33)	0.00 (0.00)	6.67 (8.16)	0.00 (0.00)	15.24 (9.11)	21.90 (7.59)	6.67 (13.33)	10.00 (13.33)	10.00 (13.33)	9.52 (13.13)
chen_ischaemic_stroke	13.33 (4.44)	6.67 (5.44)	24.44 (8.31)	6.67 (8.89)	6.67 (8.89)	8.89 (10.89)	8.89 (10.89)	13.33 (8.31)	13.33 (8.31)	13.33 (8.31)	6.67 (5.44)
chen_lymphoma	2.50 (5.00)	0.00 (0.00)	0.00 (0.00)	0.00 (0.00)	2.50 (5.00)	2.50 (5.00)	0.00 (0.00)	0.00 (0.00)	0.00 (0.00)	0.00 (0.00)	0.00 (0.00)
chen_migraine	8.00 (9.80)	0.00 (0.00)	8.00 (9.80)	4.00 (8.00)	8.00 (9.80)	0.00 (0.00)	0.00 (0.00)	0.00 (0.00)	0.00 (0.00)	0.00 (0.00)	8.00 (9.80)
chen_myocardial_ischemia	0.00 (0.00)	5.00 (10.00)	2.50 (5.00)	2.50 (5.00)	2.86 (5.71)	5.71 (11.43)	5.36 (6.59)	5.00 (10.00)	5.00 (10.00)	5.00 (10.00)	0.00 (0.00)
chen_neural_tube_defects	24.00 (15.94)	20.00 (18.71)	10.00 (12.25)	29.00 (24.78)	0.00 (0.00)	5.00 (10.00)	20.00 (18.71)	29.00 (24.78)	29.00 (24.78)	29.00 (24.78)	24.00 (15.94)
chen_osteoarthritis	15.36 (14.53)	21.07 (12.90)	8.57 (7.00)	21.43 (5.98)	14.29 (15.65)	8.57 (11.43)	27.14 (18.15)	12.86 (11.20)	15.71 (9.20)	18.57 (10.45)	21.07 (12.90)
chen_pancreatitis	7.33 (9.04)	0.00 (0.00)	0.00 (0.00)	4.00 (8.00)	0.00 (0.00)	0.00 (0.00)	0.00 (0.00)	4.00 (8.00)	4.00 (8.00)	4.00 (8.00)	4.00 (8.00)
chen_systemic_scleroderma	6.67 (8.16)	3.33 (6.67)	14.00 (12.72)	7.33 (9.04)	3.33 (6.67)	0.00 (0.00)	0.00 (0.00)	3.33 (6.67)	4.00 (8.00)	4.00 (8.00)	6.67 (8.16)
chen_ulcerative_colitis	11.43 (14.00)	11.90 (10.86)	5.71 (7.00)	9.05 (7.44)	5.71 (7.00)	23.81 (15.06)	23.81 (12.05)	11.43 (14.00)	14.76 (12.81)	17.62 (16.61)	11.43 (14.00)
goh_bone	20.00 (11.43)	28.57 (0.00)	11.43 (14.00)	14.29 (12.78)	11.43 (14.00)	20.00 (11.43)	25.71 (10.69)	22.86 (7.00)	20.00 (7.00)	22.86 (11.43)	22.86 (7.00)
goh_cancer	2.22 (2.43)	1.78 (2.18)	3.11 (2.67)	0.00 (0.00)	0.00 (0.00)	0.00 (0.00)	0.00 (0.00)	1.78 (2.18)	1.33 (1.78)	0.00 (0.00)	0.44 (0.89)
goh_cardiovascular	6.00 (4.90)	11.90 (5.14)	0.00 (0.00)	0.00 (0.00)	0.00 (0.00)	0.00 (0.00)	0.00 (0.00)	7.95 (4.04)	5.00 (5.48)	0.00 (0.00)	3.00 (4.00)
goh_connective_tissue	5.64 (7.37)	7.82 (7.44)	0.00 (0.00)	4.00 (8.00)	3.82 (4.69)	3.64 (4.45)	3.82 (4.69)	7.82 (7.44)	0.00 (0.00)	0.00 (0.00)	2.00 (4.00)
goh_dermatological	15.33 (7.54)	16.58 (4.76)	0.00 (0.00)	7.75 (4.84)	2.50 (3.06)	1.25 (2.50)	7.75 (2.80)	16.58 (4.76)	9.00 (3.21)	3.83 (3.13)	3.83 (3.13)
goh_developmental	12.73 (9.27)	10.91 (10.60)	9.27 (5.76)	5.45 (7.27)	3.64 (4.45)	3.64 (4.45)	10.91 (6.80)	14.55 (10.91)	12.73 (9.27)	12.73 (9.27)	7.27 (6.80)
goh_ear,nose,throat	14.67 (14.70)	14.67 (14.70)	4.00 (8.00)	18.00 (12.75)	14.00 (7.12)	14.00 (7.12)	18.00 (12.75)	14.67 (14.70)	14.67 (14.70)	18.00 (12.75)	14.67 (14.70)
goh_endocrine	10.11 (4.35)	16.21 (5.62)	2.11 (2.58)	0.00 (0.00)	0.00 (0.00)	0.00 (0.00)	0.00 (0.00)	12.16 (4.99)	9.16 (3.72)	0.00 (0.00)	2.00 (2.45)
goh_gastrointestinal	22.00 (12.88)	31.00 (17.44)	4.00 (8.00)	27.00 (17.20)	13.00 (10.77)	17.00 (15.36)	31.00 (17.44)	22.00 (12.88)	22.00 (12.88)	31.00 (17.44)	22.00 (12.88)
goh_hematological	17.24 (5.77)	18.62 (7.10)	11.03 (5.07)	0.00 (0.00)	0.00 (0.00)	0.00 (0.00)	0.00 (0.00)	19.31 (6.40)	13.10 (4.02)	0.69 (1.38)	3.45 (2.18)
goh_immunological	10.50 (4.12)	12.07 (5.61)	7.23 (2.96)	0.00 (0.00)	0.00 (0.00)	0.00 (0.00)	0.00 (0.00)	13.67 (4.72)	7.27 (3.94)	0.00 (0.00)	1.60 (1.96)
goh_metabolic	7.88 (4.92)	9.09 (4.29)	0.00 (0.00)	0.00 (0.00)	0.00 (0.00)	0.00 (0.00)	0.00 (0.00)	7.88 (4.92)	4.85 (2.42)	0.61 (1.21)	2.42 (2.27)
goh_multiple	9.68 (2.93)	10.71 (1.85)	0.51 (1.03)	0.00 (0.00)	0.00 (0.00)	0.00 (0.00)	0.00 (0.00)	12.24 (1.00)	8.65 (1.92)	0.51 (1.03)	5.10 (0.05)
goh_muscular	20.45 (7.06)	17.12 (8.00)	0.00 (0.00)	8.48 (5.28)	6.67 (8.16)	10.00 (6.24)	15.45 (8.75)	15.45 (6.99)	13.79 (7.48)	13.79 (7.48)	10.45 (9.01)
goh_neurological	2.34 (1.47)	3.27 (1.13)	3.73 (1.13)	0.00 (0.00)	0.00 (0.00)	0.00 (0.00)	0.00 (0.00)	4.67 (0.04)	0.93 (1.14)	0.47 (0.93)	0.93 (1.14)
goh_nutritional	29.00 (10.68)	29.00 (10.68)	38.00 (19.39)	38.00 (19.39)	19.00 (9.70)	29.00 (10.68)	34.00 (13.19)	33.00 (10.30)	29.00 (10.68)	29.00 (10.68)	29.00 (10.68)
goh_ophthamological	12.00 (4.00)	13.00 (4.00)	0.00 (0.00)	0.00 (0.00)	0.00 (0.00)	0.00 (0.00)	0.00 (0.00)	13.00 (4.00)	11.00 (4.90)	4.00 (3.74)	5.00 (5.48)
goh_psychiatric	0.00 (0.00)	0.00 (0.00)	0.00 (0.00)	0.00 (0.00)	0.00 (0.00)	0.00 (0.00)	0.00 (0.00)	0.00 (0.00)	0.00 (0.00)	0.00 (0.00)	0.00 (0.00)
goh_renal	10.89 (9.95)	12.67 (4.80)	14.67 (10.41)	10.44 (6.35)	8.22 (7.56)	8.22 (7.56)	16.67 (5.07)	20.67 (10.79)	10.67 (7.05)	12.67 (4.80)	6.67 (8.89)
goh_respiratory	14.67 (14.70)	14.00 (12.72)	3.33 (6.67)	14.00 (12.72)	4.00 (8.00)	15.33 (14.85)	14.67 (7.48)	14.00 (12.72)	14.00 (12.72)	14.00 (12.72)	14.00 (12.72)
goh_skeletal	10.30 (8.43)	5.15 (6.75)	6.97 (6.33)	1.82 (3.64)	1.82 (3.64)	1.82 (3.64)	1.82 (3.64)	5.15 (6.75)	3.48 (4.27)	5.30 (4.34)	6.97 (6.73)
omim_adrenoleukodystrophy	100.00 (0.00)	100.00 (0.00)	50.00 (44.72)	100.00 (0.00)	60.00 (48.99)	60.00 (48.99)	90.00 (20.00)	100.00 (0.00)	100.00 (0.00)	100.00 (0.00)	100.00 (0.00)
omim_aids	30.00 (40.00)	0.00 (0.00)	0.00 (0.00)	0.00 (0.00)	0.00 (0.00)	0.00 (0.00)	30.00 (40.00)	30.00 (40.00)	30.00 (40.00)	30.00 (40.00)	30.00 (40.00)
omim_alzheimer	6.67 (13.33)	6.67 (13.33)	35.00 (22.61)	23.33 (12.25)	5.00 (10.00)	5.00 (10.00)	11.67 (14.53)	18.33 (15.28)	23.33 (12.25)	18.33 (15.28)	6.67 (13.33)
omim_amyloidosis	0.00 (0.00)	0.00 (0.00)	0.00 (0.00)	0.00 (0.00)	0.00 (0.00)	0.00 (0.00)	0.00 (0.00)	0.00 (0.00)	0.00 (0.00)	0.00 (0.00)	0.00 (0.00)
omim_amyotrophic	13.33 (16.33)	13.33 (16.33)	0.00 (0.00)	13.33 (16.33)	0.00 (0.00)	13.33 (16.33)	13.33 (16.33)	13.33 (16.33)	13.33 (16.33)	13.33 (16.33)	13.33 (16.33)
omim_anemia	20.00 (24.49)	20.00 (24.49)	10.00 (20.00)	20.00 (24.49)	0.00 (0.00)	10.00 (20.00)	20.00 (24.49)	20.00 (24.49)	20.00 (24.49)	20.00 (24.49)	20.00 (24.49)
omim_arrhythmogenic	60.00 (20.00)	60.00 (20.00)	70.00 (24.49)	70.00 (24.49)	50.00 (31.62)	50.00 (31.62)	70.00 (24.49)	70.00 (24.49)	70.00 (24.49)	70.00 (24.49)	60.00 (20.00)
omim_asthma	0.00 (0.00)	0.00 (0.00)	0.00 (0.00)	0.00 (0.00)	0.00 (0.00)	0.00 (0.00)	0.00 (0.00)	0.00 (0.00)	0.00 (0.00)	0.00 (0.00)	0.00 (0.00)
omim_atrial	40.00 (22.61)	33.33 (18.26)	16.67 (21.08)	40.00 (22.61)	6.67 (13.33)	23.33 (20.00)	33.33 (18.26)	40.00 (22.61)	33.33 (18.26)	23.33 (20.00)	40.00 (22.61)
omim_autism	0.00 (0.00)	0.00 (0.00)	0.00 (0.00)	0.00 (0.00)	0.00 (0.00)	0.00 (0.00)	0.00 (0.00)	0.00 (0.00)	0.00 (0.00)	0.00 (0.00)	0.00 (0.00)
omim_autoimmune	10.00 (20.00)	20.00 (24.49)	30.00 (40.00)	30.00 (40.00)	10.00 (20.00)	10.00 (20.00)	30.00 (40.00)	30.00 (40.00)	30.00 (40.00)	30.00 (40.00)	20.00 (24.49)
omim_bardet_biedl	30.00 (24.49)	0.00 (0.00)	0.00 (0.00)	30.00 (40.00)	0.00 (0.00)	0.00 (0.00)	0.00 (0.00)	10.00 (20.00)	10.00 (20.00)	0.00 (0.00)	30.00 (24.49)
omim_blood	3.33 (6.67)	0.00 (0.00)	9.52 (7.82)	6.19 (7.62)	0.00 (0.00)	0.00 (0.00)	8.57 (11.43)	2.86 (5.71)	2.86 (5.71)	0.00 (0.00)	3.33 (6.67)
omim_brachydactyly	50.00 (44.72)	50.00 (44.72)	50.00 (44.72)	50.00 (44.72)	10.00 (20.00)	40.00 (37.42)	50.00 (44.72)	50.00 (44.72)	50.00 (44.72)	50.00 (44.72)	50.00 (44.72)
omim_breast	8.00 (9.80)	7.33 (9.04)	14.00 (12.72)	15.33 (7.77)	10.67 (8.79)	7.33 (9.04)	18.00 (10.67)	7.33 (9.04)	14.67 (7.48)	14.67 (7.48)	12.00 (9.80)
omim_cardiomyopathy	2.50 (5.00)	11.39 (7.05)	2.50 (5.00)	9.17 (8.41)	6.67 (8.89)	11.11 (9.94)	11.39 (7.05)	4.72 (5.80)	6.94 (5.69)	16.11 (5.02)	11.39 (7.05)
omim_cataract	36.00 (13.56)	36.00 (13.56)	0.00 (0.00)	36.00 (13.56)	40.00 (16.73)	49.00 (18.55)	44.00 (13.56)	36.00 (13.56)	36.00 (13.56)	49.00 (18.55)	40.00 (10.95)
omim_cerebral	0.00 (0.00)	0.00 (0.00)	0.00 (0.00)	0.00 (0.00)	0.00 (0.00)	0.00 (0.00)	0.00 (0.00)	0.00 (0.00)	0.00 (0.00)	0.00 (0.00)	0.00 (0.00)
omim_charcot_marie_tooth	8.00 (9.80)	8.00 (9.80)	4.00 (8.00)	8.00 (9.80)	4.00 (8.00)	14.00 (19.60)	18.00 (18.33)	4.00 (8.00)	4.00 (8.00)	8.00 (9.80)	13.00 (10.77)
omim_colon	0.00 (0.00)	0.00 (0.00)	0.00 (0.00)	0.00 (0.00)	20.00 (40.00)	20.00 (40.00)	0.00 (0.00)	0.00 (0.00)	0.00 (0.00)	0.00 (0.00)	0.00 (0.00)
omim_colorectal	11.90 (16.77)	11.90 (16.77)	9.52 (7.82)	12.38 (15.24)	16.67 (10.54)	16.67 (10.54)	21.90 (10.48)	11.90 (16.77)	15.24 (15.69)	25.24 (15.18)	15.24 (15.69)
omim_combined	26.67 (13.33)	26.67 (13.33)	6.67 (13.33)	26.67 (13.33)	13.33 (16.33)	26.67 (13.33)	26.67 (13.33)	20.00 (16.33)	26.67 (13.33)	26.67 (13.33)	26.67 (13.33)
omim_cone_rod	0.00 (0.00)	0.00 (0.00)	0.00 (0.00)	0.00 (0.00)	10.00 (20.00)	0.00 (0.00)	0.00 (0.00)	0.00 (0.00)	0.00 (0.00)	0.00 (0.00)	0.00 (0.00)
omim_congenital	21.67 (19.44)	16.67 (13.94)	11.67 (14.53)	16.67 (13.94)	21.67 (19.44)	16.67 (13.94)	21.67 (19.44)	21.67 (19.44)	21.67 (19.44)	21.67 (19.44)	21.67 (19.44)
omim_coronary	0.00 (0.00)	0.00 (0.00)	0.00 (0.00)	6.67 (13.33)	6.67 (13.33)	6.67 (13.33)	0.00 (0.00)	0.00 (0.00)	0.00 (0.00)	0.00 (0.00)	0.00 (0.00)
omim_deafness	9.17 (8.41)	9.17 (8.41)	2.50 (5.00)	9.17 (8.41)	6.67 (5.44)	8.89 (8.31)	11.39 (7.05)	9.17 (8.41)	9.17 (8.41)	8.89 (8.31)	9.17 (8.41)
omim_dementia	0.00 (0.00)	0.00 (0.00)	50.00 (44.72)	40.00 (37.42)	20.00 (40.00)	30.00 (40.00)	40.00 (37.42)	30.00 (40.00)	30.00 (40.00)	40.00 (37.42)	0.00 (0.00)
omim_diabetes	8.00 (7.48)	10.00 (6.32)	6.00 (4.90)	4.00 (8.00)	2.00 (4.00)	6.00 (4.90)	14.00 (4.90)	8.00 (7.48)	10.00 (6.32)	8.00 (7.48)	10.00 (6.32)
omim_diamond_blackfan	30.00 (40.00)	0.00 (0.00)	0.00 (0.00)	10.00 (20.00)	0.00 (0.00)	0.00 (0.00)	0.00 (0.00)	20.00 (40.00)	20.00 (40.00)	0.00 (0.00)	30.00 (40.00)
omim_dystonia	0.00 (0.00)	0.00 (0.00)	0.00 (0.00)	0.00 (0.00)	0.00 (0.00)	0.00 (0.00)	0.00 (0.00)	0.00 (0.00)	0.00 (0.00)	0.00 (0.00)	0.00 (0.00)
omim_ectodermal	30.00 (24.49)	30.00 (24.49)	0.00 (0.00)	30.00 (24.49)	30.00 (24.49)	30.00 (24.49)	30.00 (24.49)	30.00 (24.49)	30.00 (24.49)	30.00 (24.49)	30.00 (24.49)
omim_epidermolysis	60.00 (38.87)	60.00 (38.87)	70.00 (26.67)	73.33 (24.94)	13.33 (16.33)	60.00 (38.87)	80.00 (26.67)	80.00 (26.67)	80.00 (26.67)	60.00 (38.87)	70.00 (26.67)
omim_epilepsy	15.00 (12.25)	20.00 (18.71)	5.00 (10.00)	15.00 (12.25)	15.00 (12.25)	10.00 (12.25)	10.00 (12.25)	15.00 (12.25)	15.00 (12.25)	15.00 (12.25)	15.00 (12.25)
omim_epileptic	0.00 (0.00)	0.00 (0.00)	0.00 (0.00)	0.00 (0.00)	0.00 (0.00)	0.00 (0.00)	0.00 (0.00)	0.00 (0.00)	0.00 (0.00)	0.00 (0.00)	0.00 (0.00)
omim_epiphyseal	70.00 (24.49)	70.00 (24.49)	50.00 (31.62)	70.00 (24.49)	10.00 (20.00)	10.00 (20.00)	60.00 (20.00)	70.00 (24.49)	70.00 (24.49)	70.00 (24.49)	70.00 (24.49)
omim_esophageal	0.00 (0.00)	0.00 (0.00)	0.00 (0.00)	0.00 (0.00)	0.00 (0.00)	0.00 (0.00)	0.00 (0.00)	0.00 (0.00)	0.00 (0.00)	0.00 (0.00)	0.00 (0.00)
omim_factor	80.00 (24.49)	80.00 (24.49)	50.00 (31.62)	60.00 (37.42)	20.00 (40.00)	30.00 (40.00)	60.00 (37.42)	80.00 (24.49)	80.00 (24.49)	70.00 (40.00)	80.00 (24.49)
omim_fanconi	46.67 (33.99)	53.33 (40.00)	46.67 (45.22)	46.67 (45.22)	33.33 (29.81)	46.67 (45.22)	46.67 (45.22)	46.67 (45.22)	46.67 (45.22)	46.67 (45.22)	46.67 (45.22)
omim_gastric	0.00 (0.00)	0.00 (0.00)	0.00 (0.00)	0.00 (0.00)	0.00 (0.00)	0.00 (0.00)	0.00 (0.00)	0.00 (0.00)	0.00 (0.00)	0.00 (0.00)	0.00 (0.00)
omim_glomerulosclerosis	0.00 (0.00)	0.00 (0.00)	0.00 (0.00)	0.00 (0.00)	0.00 (0.00)	0.00 (0.00)	0.00 (0.00)	0.00 (0.00)	0.00 (0.00)	0.00 (0.00)	0.00 (0.00)
omim_glycogen	30.00 (24.49)	20.00 (24.49)	0.00 (0.00)	20.00 (24.49)	20.00 (24.49)	20.00 (24.49)	20.00 (24.49)	20.00 (24.49)	20.00 (24.49)	20.00 (24.49)	30.00 (24.49)
omim_hemolytic	40.00 (22.61)	40.00 (22.61)	28.33 (16.33)	33.33 (18.26)	11.67 (14.53)	16.67 (13.94)	28.33 (16.33)	40.00 (22.61)	40.00 (22.61)	33.33 (18.26)	40.00 (22.61)
omim_hemophagocytic	20.00 (24.49)	0.00 (0.00)	0.00 (0.00)	10.00 (20.00)	0.00 (0.00)	0.00 (0.00)	0.00 (0.00)	10.00 (20.00)	10.00 (20.00)	0.00 (0.00)	20.00 (24.49)
omim_hepatocellular	0.00 (0.00)	0.00 (0.00)	0.00 (0.00)	20.00 (40.00)	30.00 (40.00)	30.00 (40.00)	20.00 (40.00)	0.00 (0.00)	0.00 (0.00)	30.00 (40.00)	0.00 (0.00)
omim_high	50.00 (31.62)	30.00 (40.00)	30.00 (40.00)	30.00 (40.00)	0.00 (0.00)	10.00 (20.00)	30.00 (40.00)	30.00 (40.00)	30.00 (40.00)	30.00 (40.00)	50.00 (31.62)
omim_hypercholesterolemia	20.00 (24.49)	20.00 (24.49)	30.00 (24.49)	30.00 (24.49)	0.00 (0.00)	20.00 (24.49)	30.00 (24.49)	30.00 (24.49)	30.00 (24.49)	30.00 (24.49)	20.00 (24.49)
omim_hypertension	0.00 (0.00)	20.00 (24.49)	0.00 (0.00)	20.00 (24.49)	0.00 (0.00)	0.00 (0.00)	0.00 (0.00)	10.00 (20.00)	10.00 (20.00)	0.00 (0.00)	0.00 (0.00)
omim_ichthyosis	10.00 (20.00)	10.00 (20.00)	0.00 (0.00)	10.00 (20.00)	0.00 (0.00)	0.00 (0.00)	0.00 (0.00)	10.00 (20.00)	10.00 (20.00)	0.00 (0.00)	10.00 (20.00)
omim_immunodeficiency	15.00 (20.00)	10.00 (12.25)	18.00 (15.68)	9.00 (11.14)	0.00 (0.00)	4.00 (8.00)	19.00 (9.70)	19.00 (18.55)	14.00 (11.58)	4.00 (8.00)	15.00 (20.00)
omim_keratosis	20.00 (40.00)	30.00 (40.00)	20.00 (40.00)	30.00 (40.00)	0.00 (0.00)	10.00 (20.00)	30.00 (40.00)	30.00 (40.00)	30.00 (40.00)	0.00 (0.00)	30.00 (40.00)
omim_leigh	20.00 (24.49)	20.00 (24.49)	0.00 (0.00)	0.00 (0.00)	0.00 (0.00)	0.00 (0.00)	0.00 (0.00)	20.00 (24.49)	20.00 (24.49)	0.00 (0.00)	20.00 (24.49)
omim_leukemia	3.48 (4.27)	3.48 (4.27)	6.97 (8.55)	1.67 (3.33)	1.67 (3.33)	1.67 (3.33)	5.15 (4.22)	5.15 (6.75)	5.15 (6.75)	5.15 (4.22)	3.48 (4.27)
omim_long	40.00 (8.16)	50.00 (25.82)	40.00 (8.16)	46.67 (12.47)	40.00 (8.16)	40.00 (8.16)	40.00 (8.16)	40.00 (8.16)	40.00 (8.16)	40.00 (8.16)	40.00 (8.16)
omim_lung	13.33 (16.33)	0.00 (0.00)	0.00 (0.00)	0.00 (0.00)	0.00 (0.00)	0.00 (0.00)	0.00 (0.00)	6.67 (13.33)	6.67 (13.33)	13.33 (16.33)	13.33 (16.33)
omim_lymphoma	0.00 (0.00)	0.00 (0.00)	0.00 (0.00)	0.00 (0.00)	0.00 (0.00)	0.00 (0.00)	0.00 (0.00)	0.00 (0.00)	0.00 (0.00)	0.00 (0.00)	0.00 (0.00)
omim_macular	40.00 (16.73)	44.00 (22.45)	26.00 (7.35)	36.00 (13.56)	13.00 (10.77)	18.00 (9.27)	31.00 (12.00)	36.00 (13.56)	36.00 (13.56)	40.00 (16.73)	40.00 (16.73)
omim_malaria	0.00 (0.00)	0.00 (0.00)	0.00 (0.00)	0.00 (0.00)	0.00 (0.00)	0.00 (0.00)	0.00 (0.00)	0.00 (0.00)	0.00 (0.00)	0.00 (0.00)	0.00 (0.00)
omim_melanoma	0.00 (0.00)	0.00 (0.00)	20.00 (24.49)	20.00 (24.49)	0.00 (0.00)	0.00 (0.00)	10.00 (20.00)	20.00 (24.49)	20.00 (24.49)	10.00 (20.00)	0.00 (0.00)
omim_mental	0.00 (0.00)	0.00 (0.00)	5.45 (4.45)	1.82 (3.64)	0.00 (0.00)	0.00 (0.00)	3.64 (4.45)	1.82 (3.64)	1.82 (3.64)	0.00 (0.00)	0.00 (0.00)
omim_microcephaly	0.00 (0.00)	0.00 (0.00)	0.00 (0.00)	0.00 (0.00)	0.00 (0.00)	0.00 (0.00)	0.00 (0.00)	0.00 (0.00)	0.00 (0.00)	0.00 (0.00)	0.00 (0.00)
omim_microphthalmia	26.67 (22.61)	10.00 (20.00)	0.00 (0.00)	0.00 (0.00)	0.00 (0.00)	0.00 (0.00)	0.00 (0.00)	0.00 (0.00)	0.00 (0.00)	0.00 (0.00)	16.67 (21.08)
omim_microvascular	0.00 (0.00)	0.00 (0.00)	0.00 (0.00)	0.00 (0.00)	0.00 (0.00)	0.00 (0.00)	0.00 (0.00)	0.00 (0.00)	0.00 (0.00)	0.00 (0.00)	0.00 (0.00)
omim_mitochondrial	0.00 (0.00)	0.00 (0.00)	0.00 (0.00)	0.00 (0.00)	0.00 (0.00)	0.00 (0.00)	0.00 (0.00)	0.00 (0.00)	0.00 (0.00)	0.00 (0.00)	0.00 (0.00)
omim_multiple	31.67 (9.72)	31.67 (9.72)	15.00 (12.25)	25.00 (15.81)	20.00 (10.00)	20.00 (10.00)	20.00 (10.00)	20.00 (10.00)	20.00 (10.00)	20.00 (10.00)	31.67 (9.72)
omim_muscular	61.67 (33.17)	56.67 (32.66)	46.67 (24.49)	46.67 (24.49)	16.67 (13.94)	16.67 (13.94)	46.67 (24.49)	46.67 (24.49)	46.67 (24.49)	46.67 (24.49)	61.67 (33.17)
omim_myasthenic	60.00 (37.42)	60.00 (37.42)	30.00 (40.00)	60.00 (37.42)	50.00 (31.62)	60.00 (37.42)	60.00 (37.42)	60.00 (37.42)	60.00 (37.42)	60.00 (37.42)	60.00 (37.42)
omim_myocardial	16.67 (21.08)	26.67 (38.87)	10.00 (20.00)	26.67 (38.87)	20.00 (24.49)	30.00 (40.00)	36.67 (37.12)	16.67 (21.08)	16.67 (21.08)	26.67 (22.61)	26.67 (22.61)
omim_myopathy	10.00 (12.25)	10.00 (12.25)	5.00 (10.00)	10.00 (12.25)	5.00 (10.00)	10.00 (12.25)	20.00 (10.00)	10.00 (12.25)	10.00 (12.25)	20.00 (10.00)	15.00 (12.25)
omim_neuropathy	13.33 (16.33)	13.33 (16.33)	0.00 (0.00)	13.33 (16.33)	6.67 (13.33)	20.00 (26.67)	13.33 (16.33)	6.67 (13.33)	13.33 (16.33)	13.33 (16.33)	13.33 (16.33)
omim_noonan	6.67 (13.33)	0.00 (0.00)	0.00 (0.00)	20.00 (40.00)	20.00 (40.00)	10.00 (20.00)	10.00 (20.00)	0.00 (0.00)	0.00 (0.00)	10.00 (20.00)	6.67 (13.33)
omim_obesity	26.00 (14.63)	26.00 (14.63)	15.00 (20.00)	23.00 (2.45)	22.00 (12.88)	18.00 (9.27)	22.00 (12.88)	31.00 (17.44)	31.00 (17.44)	26.00 (14.63)	26.00 (14.63)
omim_osteopetrosis	0.00 (0.00)	0.00 (0.00)	30.00 (40.00)	30.00 (40.00)	0.00 (0.00)	10.00 (20.00)	30.00 (40.00)	30.00 (40.00)	30.00 (40.00)	0.00 (0.00)	30.00 (40.00)
omim_ovarian	6.67 (13.33)	0.00 (0.00)	20.00 (16.33)	13.33 (16.33)	20.00 (26.67)	20.00 (26.67)	6.67 (13.33)	13.33 (16.33)	6.67 (13.33)	26.67 (24.94)	6.67 (13.33)
omim_pancreatic	0.00 (0.00)	0.00 (0.00)	20.00 (16.33)	20.00 (16.33)	18.33 (15.28)	18.33 (15.28)	13.33 (16.33)	5.00 (10.00)	5.00 (10.00)	18.33 (15.28)	0.00 (0.00)
omim_parkinson	0.00 (0.00)	10.00 (20.00)	36.67 (19.44)	26.67 (22.61)	10.00 (20.00)	10.00 (20.00)	30.00 (24.49)	30.00 (24.49)	30.00 (24.49)	20.00 (24.49)	10.00 (20.00)
omim_pituitary	30.00 (24.49)	20.00 (24.49)	0.00 (0.00)	30.00 (24.49)	30.00 (24.49)	30.00 (24.49)	40.00 (20.00)	30.00 (24.49)	30.00 (24.49)	30.00 (24.49)	30.00 (24.49)
omim_prostate	0.00 (0.00)	0.00 (0.00)	0.00 (0.00)	0.00 (0.00)	3.33 (6.67)	0.00 (0.00)	0.00 (0.00)	0.00 (0.00)	0.00 (0.00)	0.00 (0.00)	0.00 (0.00)
omim_pulmonary	0.00 (0.00)	0.00 (0.00)	0.00 (0.00)	0.00 (0.00)	6.67 (13.33)	6.67 (13.33)	6.67 (13.33)	0.00 (0.00)	0.00 (0.00)	6.67 (13.33)	0.00 (0.00)
omim_renal	20.00 (18.71)	15.00 (12.25)	15.00 (12.25)	25.00 (22.36)	5.00 (10.00)	15.00 (12.25)	30.00 (24.49)	15.00 (12.25)	15.00 (12.25)	15.00 (20.00)	30.00 (29.15)
omim_retinitis	15.00 (14.58)	12.50 (13.69)	2.50 (5.00)	15.00 (18.37)	7.22 (5.92)	9.72 (9.30)	19.72 (12.92)	15.00 (14.58)	15.00 (14.58)	12.50 (13.69)	15.00 (14.58)
omim_rheumatoid	13.33 (16.33)	13.33 (16.33)	6.67 (13.33)	13.33 (16.33)	6.67 (13.33)	6.67 (13.33)	13.33 (16.33)	6.67 (13.33)	13.33 (16.33)	13.33 (16.33)	13.33 (16.33)
omim_schizophrenia	0.00 (0.00)	0.00 (0.00)	0.00 (0.00)	0.00 (0.00)	0.00 (0.00)	0.00 (0.00)	0.00 (0.00)	0.00 (0.00)	0.00 (0.00)	0.00 (0.00)	0.00 (0.00)
omim_severe	36.67 (19.44)	36.67 (19.44)	30.00 (24.49)	30.00 (24.49)	10.00 (20.00)	10.00 (20.00)	30.00 (24.49)	30.00 (24.49)	30.00 (24.49)	30.00 (24.49)	36.67 (19.44)
omim_short	10.00 (20.00)	0.00 (0.00)	0.00 (0.00)	10.00 (20.00)	0.00 (0.00)	0.00 (0.00)	20.00 (24.49)	10.00 (20.00)	10.00 (20.00)	0.00 (0.00)	20.00 (24.49)
omim_spastic	0.00 (0.00)	0.00 (0.00)	0.00 (0.00)	0.00 (0.00)	0.00 (0.00)	0.00 (0.00)	0.00 (0.00)	0.00 (0.00)	0.00 (0.00)	0.00 (0.00)	0.00 (0.00)
omim_spinocerebellar	5.00 (10.00)	0.00 (0.00)	0.00 (0.00)	0.00 (0.00)	0.00 (0.00)	0.00 (0.00)	0.00 (0.00)	0.00 (0.00)	0.00 (0.00)	0.00 (0.00)	0.00 (0.00)
omim_systemic	13.33 (16.33)	13.33 (16.33)	0.00 (0.00)	0.00 (0.00)	0.00 (0.00)	0.00 (0.00)	0.00 (0.00)	6.67 (13.33)	6.67 (13.33)	0.00 (0.00)	13.33 (16.33)
omim_thrombophilia	40.00 (22.61)	40.00 (22.61)	45.00 (16.33)	51.67 (17.00)	10.00 (12.25)	20.00 (24.49)	45.00 (16.33)	56.67 (19.29)	56.67 (19.29)	45.00 (16.33)	50.00 (29.34)
omim_thyroid	4.00 (8.00)	4.00 (8.00)	0.00 (0.00)	13.00 (10.77)	4.00 (8.00)	4.00 (8.00)	8.00 (9.80)	4.00 (8.00)	4.00 (8.00)	4.00 (8.00)	8.00 (9.80)
omim_usher	60.00 (48.99)	60.00 (48.99)	0.00 (0.00)	60.00 (48.99)	60.00 (48.99)	50.00 (44.72)	60.00 (48.99)	60.00 (48.99)	60.00 (48.99)	60.00 (48.99)	60.00 (48.99)
omim_xeroderma	90.00 (20.00)	80.00 (24.49)	50.00 (31.62)	90.00 (20.00)	10.00 (20.00)	50.00 (31.62)	90.00 (20.00)	90.00 (20.00)	90.00 (20.00)	90.00 (20.00)	90.00 (20.00)
omim_zellweger	100.00 (0.00)	100.00 (0.00)	83.33 (21.08)	100.00 (0.00)	70.00 (24.49)	80.00 (24.49)	100.00 (0.00)	100.00 (0.00)	100.00 (0.00)	100.00 (0.00)	100.00 (0.00)
* For each disorder (rows), the average sensitivity at top 1% of the predictions of the prioritization methods (columns) in the five-fold validation are given on each network (sheets). Values in parenthesis are the standard deviations of sensitivity values among all five folds.

## Sheet: Entrez
	NetScore	NetZcore	NetShort	Func. Flow	PageRank	Random walk	Network propagation	NetCombo (NetScore + NetZcore + NetShort)	NetScore + NetZcore + NetShort + Network Propogation	All 7	NetScore + Network Propogation
chen_atherosclerosis	6.19 (7.62)	9.05 (7.44)	11.90 (10.86)	9.52 (7.82)	2.86 (5.71)	2.86 (5.71)	2.86 (5.71)	9.05 (11.70)	11.90 (10.86)	11.90 (10.86)	6.19 (7.62)
chen_autism	2.86 (5.71)	0.00 (0.00)	5.71 (7.00)	0.00 (0.00)	0.00 (0.00)	0.00 (0.00)	0.00 (0.00)	2.86 (5.71)	2.86 (5.71)	2.86 (5.71)	2.86 (5.71)
chen_cervical_carcinoma	21.43 (16.90)	16.07 (15.07)	11.07 (5.58)	8.21 (11.27)	5.36 (6.59)	11.07 (10.62)	16.79 (10.81)	21.43 (16.90)	21.43 (16.90)	27.14 (13.09)	21.43 (16.90)
chen_cirrhosis	12.00 (16.00)	8.00 (9.80)	12.00 (9.80)	8.00 (16.00)	0.00 (0.00)	8.00 (9.80)	12.00 (9.80)	16.00 (14.97)	16.00 (14.97)	16.00 (14.97)	12.00 (16.00)
chen_endometrial_carcinoma	14.29 (12.78)	11.43 (10.69)	17.14 (10.69)	14.29 (9.04)	11.43 (10.69)	14.29 (12.78)	22.86 (17.14)	11.43 (10.69)	11.43 (10.69)	11.43 (10.69)	11.43 (10.69)
chen_endometriosis	6.94 (9.04)	2.22 (4.44)	9.17 (8.41)	6.94 (5.69)	4.72 (5.80)	6.94 (5.69)	2.22 (4.44)	2.22 (4.44)	2.22 (4.44)	2.22 (4.44)	6.94 (9.04)
chen_epilepsy	8.57 (11.43)	5.71 (7.00)	5.71 (7.00)	2.86 (5.71)	0.00 (0.00)	0.00 (0.00)	5.71 (7.00)	11.43 (10.69)	11.43 (10.69)	8.57 (11.43)	8.57 (11.43)
chen_graves_disease	5.36 (6.59)	2.86 (5.71)	2.86 (5.71)	2.50 (5.00)	2.86 (5.71)	5.71 (7.00)	11.07 (5.58)	5.36 (6.59)	5.36 (6.59)	5.36 (6.59)	5.36 (6.59)
chen_hypercholesterolaemia	44.00 (26.53)	44.00 (26.53)	40.00 (12.65)	40.00 (12.65)	12.00 (16.00)	20.00 (21.91)	40.00 (21.91)	52.00 (20.40)	48.00 (16.00)	48.00 (16.00)	48.00 (27.13)
chen_inflammatory_bowel_disease	12.38 (6.28)	12.38 (6.28)	12.38 (12.27)	19.05 (11.57)	9.05 (7.44)	15.24 (9.11)	28.10 (10.90)	15.71 (1.17)	15.71 (1.17)	18.57 (5.08)	12.38 (6.28)
chen_ischaemic_stroke	10.67 (9.47)	6.22 (5.10)	18.89 (19.45)	6.22 (8.12)	2.22 (4.44)	6.44 (8.79)	10.67 (9.47)	10.44 (10.97)	10.44 (10.97)	10.44 (10.97)	4.22 (5.18)
chen_lymphoma	11.11 (14.05)	2.22 (4.44)	7.22 (9.88)	2.50 (5.00)	4.72 (5.80)	6.94 (5.69)	6.94 (5.69)	6.67 (8.89)	4.44 (5.44)	4.44 (5.44)	11.11 (14.05)
chen_migraine	0.00 (0.00)	0.00 (0.00)	3.33 (6.67)	0.00 (0.00)	6.67 (13.33)	3.33 (6.67)	0.00 (0.00)	0.00 (0.00)	0.00 (0.00)	0.00 (0.00)	0.00 (0.00)
chen_myocardial_ischemia	7.86 (10.20)	10.36 (9.48)	5.00 (10.00)	5.36 (6.59)	2.50 (5.00)	5.00 (6.12)	5.00 (6.12)	7.86 (6.45)	7.86 (6.45)	7.86 (6.45)	7.86 (10.20)
chen_neural_tube_defects	24.00 (19.60)	16.00 (19.60)	12.00 (9.80)	12.00 (9.80)	0.00 (0.00)	8.00 (16.00)	20.00 (17.89)	24.00 (23.32)	24.00 (23.32)	24.00 (23.32)	24.00 (19.60)
chen_osteoarthritis	22.50 (5.00)	22.50 (9.35)	10.00 (5.00)	15.00 (9.35)	15.00 (9.35)	27.50 (14.58)	30.00 (10.00)	20.00 (6.12)	22.50 (5.00)	25.00 (7.91)	22.50 (5.00)
chen_pancreatitis	12.00 (16.00)	0.00 (0.00)	0.00 (0.00)	4.00 (8.00)	0.00 (0.00)	4.00 (8.00)	8.00 (9.80)	0.00 (0.00)	0.00 (0.00)	0.00 (0.00)	8.00 (9.80)
chen_systemic_scleroderma	16.67 (14.91)	3.33 (6.67)	13.33 (12.47)	23.33 (13.33)	3.33 (6.67)	10.00 (13.33)	10.00 (8.16)	13.33 (12.47)	13.33 (12.47)	20.00 (6.67)	16.67 (10.54)
chen_ulcerative_colitis	8.21 (6.74)	14.29 (12.78)	0.00 (0.00)	10.71 (9.58)	5.36 (6.59)	13.93 (12.80)	14.29 (12.78)	11.07 (10.62)	8.57 (11.43)	8.57 (11.43)	11.07 (10.62)
goh_bone	16.67 (5.76)	18.89 (5.31)	0.00 (0.00)	11.94 (10.60)	2.50 (5.00)	6.94 (9.04)	16.39 (4.76)	16.67 (5.76)	14.17 (8.89)	14.17 (8.89)	16.67 (5.76)
goh_cancer	3.17 (2.38)	1.58 (1.47)	3.18 (2.03)	0.00 (0.00)	0.00 (0.00)	0.00 (0.00)	0.00 (0.00)	2.78 (2.03)	0.79 (0.97)	0.00 (0.00)	0.00 (0.00)
goh_cardiovascular	5.22 (3.25)	5.22 (3.25)	0.87 (1.74)	1.74 (2.13)	0.00 (0.00)	0.87 (1.74)	3.48 (1.74)	5.22 (3.25)	4.35 (2.75)	0.87 (1.74)	0.87 (1.74)
goh_connective_tissue	6.28 (5.80)	3.21 (3.93)	3.08 (3.77)	4.74 (3.88)	1.54 (3.08)	1.54 (3.08)	3.21 (3.93)	3.21 (3.93)	1.67 (3.33)	1.67 (3.33)	3.21 (3.93)
goh_dermatological	15.56 (2.22)	18.89 (4.44)	2.22 (2.72)	5.56 (4.97)	0.00 (0.00)	5.56 (3.51)	17.78 (9.56)	21.11 (5.44)	12.22 (4.16)	11.11 (3.51)	11.11 (4.97)
goh_developmental	5.00 (4.08)	5.00 (4.08)	5.00 (4.08)	3.33 (6.67)	0.00 (0.00)	5.00 (4.08)	10.00 (6.24)	5.00 (4.08)	3.33 (4.08)	3.33 (4.08)	1.67 (3.33)
goh_ear,nose,throat	13.21 (0.87)	10.36 (5.22)	2.86 (5.71)	5.00 (6.12)	2.50 (5.00)	7.50 (6.12)	10.36 (5.22)	10.36 (5.22)	10.36 (5.22)	10.36 (5.22)	10.36 (5.22)
goh_endocrine	10.75 (4.39)	10.83 (2.30)	2.73 (3.64)	0.00 (0.00)	0.91 (1.82)	1.78 (2.18)	1.82 (2.23)	9.01 (2.88)	6.28 (2.13)	3.56 (3.28)	2.65 (3.50)
goh_gastrointestinal	24.67 (16.55)	25.33 (17.71)	10.67 (13.73)	25.33 (17.71)	3.33 (6.67)	14.67 (14.70)	21.33 (20.50)	24.67 (22.27)	20.67 (24.44)	20.67 (24.44)	20.67 (19.37)
goh_hematological	15.95 (2.90)	16.52 (4.69)	8.88 (0.11)	0.00 (0.00)	0.00 (0.00)	0.00 (0.00)	0.00 (0.00)	17.72 (4.06)	12.37 (5.03)	0.59 (1.18)	4.71 (3.00)
goh_immunological	10.08 (5.73)	9.37 (4.79)	9.44 (3.01)	0.00 (0.00)	0.00 (0.00)	0.00 (0.00)	0.00 (0.00)	10.08 (4.67)	5.03 (5.34)	0.00 (0.00)	0.00 (0.00)
goh_metabolic	6.76 (2.11)	8.45 (2.32)	1.69 (2.48)	0.00 (0.00)	0.00 (0.00)	0.00 (0.00)	0.00 (0.00)	9.71 (1.05)	4.65 (2.49)	1.28 (2.55)	1.70 (2.48)
goh_multiple	9.86 (2.15)	11.57 (2.86)	0.85 (1.04)	0.00 (0.00)	0.00 (0.00)	0.00 (0.00)	0.00 (0.00)	10.29 (2.04)	6.44 (3.56)	1.28 (1.70)	3.86 (2.48)
goh_muscular	15.82 (8.22)	20.22 (8.19)	0.00 (0.00)	12.86 (11.43)	11.54 (3.37)	14.51 (4.54)	20.33 (9.55)	18.68 (9.56)	12.86 (10.50)	12.86 (10.50)	14.29 (10.10)
goh_neurological	2.29 (0.78)	3.06 (1.96)	1.14 (0.93)	0.00 (0.00)	0.00 (0.00)	0.00 (0.00)	0.00 (0.00)	1.91 (1.22)	1.53 (1.44)	0.00 (0.00)	0.00 (0.00)
goh_nutritional	22.00 (27.13)	26.00 (33.23)	0.00 (0.00)	21.00 (22.00)	10.00 (20.00)	15.00 (20.00)	36.00 (22.45)	30.00 (30.98)	30.00 (30.98)	30.00 (30.98)	26.00 (33.23)
goh_ophthamological	14.53 (5.87)	18.80 (8.50)	0.87 (1.74)	5.94 (3.37)	5.11 (1.61)	5.11 (1.61)	11.05 (5.72)	16.27 (7.52)	12.79 (6.65)	7.64 (4.12)	5.11 (3.19)
goh_psychiatric	0.00 (0.00)	0.00 (0.00)	0.00 (0.00)	0.00 (0.00)	0.00 (0.00)	0.00 (0.00)	0.00 (0.00)	0.00 (0.00)	0.00 (0.00)	0.00 (0.00)	0.00 (0.00)
goh_renal	12.31 (6.15)	10.77 (6.15)	4.62 (3.77)	9.23 (3.08)	3.08 (3.77)	7.69 (6.88)	9.23 (5.76)	12.31 (7.84)	10.77 (6.15)	10.77 (6.15)	9.23 (5.76)
goh_respiratory	5.71 (7.00)	5.71 (7.00)	2.86 (5.71)	8.57 (11.43)	2.86 (5.71)	8.57 (7.00)	11.07 (5.58)	11.07 (5.58)	5.71 (7.00)	8.57 (7.00)	5.71 (7.00)
goh_skeletal	11.98 (7.41)	9.01 (5.53)	6.15 (5.76)	7.58 (4.87)	3.08 (3.77)	6.04 (3.03)	6.04 (3.03)	10.55 (3.52)	6.04 (3.03)	6.04 (3.03)	7.58 (4.87)
omim_adrenoleukodystrophy	90.00 (20.00)	90.00 (20.00)	40.00 (48.99)	90.00 (20.00)	40.00 (37.42)	40.00 (37.42)	80.00 (24.49)	90.00 (20.00)	90.00 (20.00)	90.00 (20.00)	90.00 (20.00)
omim_aids	40.00 (37.42)	30.00 (40.00)	20.00 (24.49)	20.00 (24.49)	0.00 (0.00)	10.00 (20.00)	20.00 (24.49)	20.00 (24.49)	20.00 (24.49)	20.00 (24.49)	40.00 (37.42)
omim_alzheimer	0.00 (0.00)	0.00 (0.00)	28.33 (16.33)	21.67 (19.44)	5.00 (10.00)	5.00 (10.00)	21.67 (19.44)	28.33 (16.33)	28.33 (16.33)	21.67 (19.44)	0.00 (0.00)
omim_amyloidosis	20.00 (40.00)	30.00 (40.00)	30.00 (40.00)	30.00 (40.00)	0.00 (0.00)	0.00 (0.00)	30.00 (40.00)	30.00 (40.00)	30.00 (40.00)	20.00 (40.00)	30.00 (40.00)
omim_amyotrophic	11.67 (14.53)	11.67 (14.53)	0.00 (0.00)	6.67 (13.33)	0.00 (0.00)	11.67 (14.53)	11.67 (14.53)	11.67 (14.53)	11.67 (14.53)	11.67 (14.53)	11.67 (14.53)
omim_anemia	23.33 (20.00)	23.33 (20.00)	23.33 (20.00)	13.33 (16.33)	0.00 (0.00)	6.67 (13.33)	23.33 (20.00)	13.33 (16.33)	13.33 (16.33)	13.33 (16.33)	23.33 (20.00)
omim_arrhythmogenic	60.00 (20.00)	60.00 (20.00)	70.00 (24.49)	70.00 (24.49)	30.00 (24.49)	40.00 (20.00)	60.00 (20.00)	70.00 (24.49)	70.00 (24.49)	60.00 (20.00)	60.00 (20.00)
omim_asthma	0.00 (0.00)	0.00 (0.00)	0.00 (0.00)	0.00 (0.00)	0.00 (0.00)	0.00 (0.00)	0.00 (0.00)	0.00 (0.00)	0.00 (0.00)	0.00 (0.00)	0.00 (0.00)
omim_atrial	26.67 (24.94)	20.00 (16.33)	13.33 (16.33)	13.33 (16.33)	0.00 (0.00)	0.00 (0.00)	13.33 (16.33)	13.33 (16.33)	13.33 (16.33)	13.33 (16.33)	20.00 (16.33)
omim_autism	10.00 (20.00)	16.67 (21.08)	0.00 (0.00)	0.00 (0.00)	0.00 (0.00)	0.00 (0.00)	0.00 (0.00)	0.00 (0.00)	0.00 (0.00)	0.00 (0.00)	10.00 (20.00)
omim_autoimmune	10.00 (20.00)	10.00 (20.00)	30.00 (24.49)	30.00 (24.49)	10.00 (20.00)	0.00 (0.00)	30.00 (24.49)	30.00 (24.49)	30.00 (24.49)	30.00 (24.49)	10.00 (20.00)
omim_bardet_biedl	16.67 (21.08)	0.00 (0.00)	0.00 (0.00)	23.33 (20.00)	0.00 (0.00)	0.00 (0.00)	0.00 (0.00)	10.00 (20.00)	10.00 (20.00)	0.00 (0.00)	16.67 (21.08)
omim_blood	13.93 (9.06)	11.07 (5.58)	2.86 (5.71)	2.86 (5.71)	0.00 (0.00)	5.71 (11.43)	13.93 (9.06)	8.57 (11.43)	8.57 (11.43)	5.71 (7.00)	13.93 (9.06)
omim_brachydactyly	50.00 (44.72)	50.00 (44.72)	50.00 (44.72)	50.00 (44.72)	20.00 (24.49)	20.00 (24.49)	50.00 (44.72)	50.00 (44.72)	50.00 (44.72)	50.00 (44.72)	50.00 (44.72)
omim_breast	3.33 (6.67)	6.67 (8.16)	23.33 (13.33)	10.00 (8.16)	13.33 (16.33)	13.33 (12.47)	16.67 (10.54)	6.67 (8.16)	6.67 (8.16)	20.00 (12.47)	6.67 (8.16)
omim_cardiomyopathy	8.00 (7.48)	10.00 (8.94)	2.00 (4.00)	17.27 (3.73)	2.00 (4.00)	9.82 (10.96)	19.64 (9.35)	10.00 (8.94)	10.00 (8.94)	9.82 (6.33)	10.00 (8.94)
omim_cataract	28.00 (20.40)	28.00 (20.40)	0.00 (0.00)	32.00 (20.40)	32.00 (9.80)	40.00 (12.65)	40.00 (21.91)	28.00 (20.40)	28.00 (20.40)	36.00 (19.60)	36.00 (23.32)
omim_cerebral	23.33 (20.00)	23.33 (20.00)	5.00 (10.00)	36.67 (22.11)	18.33 (15.28)	18.33 (15.28)	23.33 (20.00)	23.33 (20.00)	23.33 (20.00)	23.33 (20.00)	23.33 (20.00)
omim_charcot_marie_tooth	9.05 (7.44)	9.05 (7.44)	0.00 (0.00)	8.57 (11.43)	2.86 (5.71)	11.90 (10.86)	11.90 (10.86)	2.86 (5.71)	6.19 (7.62)	9.05 (7.44)	9.05 (7.44)
omim_colon	0.00 (0.00)	0.00 (0.00)	0.00 (0.00)	0.00 (0.00)	20.00 (40.00)	20.00 (40.00)	0.00 (0.00)	0.00 (0.00)	0.00 (0.00)	20.00 (40.00)	0.00 (0.00)
omim_colorectal	10.71 (9.58)	7.86 (10.20)	13.93 (0.71)	19.29 (6.23)	16.79 (5.93)	22.14 (6.55)	24.64 (15.67)	10.71 (9.58)	13.57 (7.95)	24.64 (9.06)	13.57 (7.95)
omim_combined	11.67 (14.53)	11.67 (14.53)	0.00 (0.00)	11.67 (14.53)	11.67 (14.53)	11.67 (14.53)	11.67 (14.53)	11.67 (14.53)	11.67 (14.53)	11.67 (14.53)	11.67 (14.53)
omim_cone_rod	26.67 (16.16)	26.67 (16.16)	0.00 (0.00)	21.67 (19.44)	15.00 (12.25)	20.00 (10.00)	31.67 (9.72)	21.67 (19.44)	21.67 (19.44)	31.67 (9.72)	31.67 (9.72)
omim_congenital	28.00 (9.80)	28.00 (9.80)	0.00 (0.00)	24.00 (8.00)	20.00 (12.65)	24.00 (8.00)	24.00 (8.00)	24.00 (8.00)	24.00 (8.00)	28.00 (9.80)	28.00 (9.80)
omim_coronary	5.00 (10.00)	5.00 (10.00)	0.00 (0.00)	0.00 (0.00)	0.00 (0.00)	5.00 (10.00)	0.00 (0.00)	0.00 (0.00)	0.00 (0.00)	0.00 (0.00)	5.00 (10.00)
omim_deafness	16.00 (13.56)	16.00 (13.56)	6.00 (8.00)	12.00 (14.70)	8.00 (4.00)	14.00 (10.20)	18.00 (13.27)	16.00 (17.44)	16.00 (17.44)	16.00 (10.20)	18.00 (13.27)
omim_dementia	20.00 (40.00)	20.00 (40.00)	60.00 (37.42)	60.00 (37.42)	10.00 (20.00)	20.00 (24.49)	50.00 (31.62)	40.00 (48.99)	50.00 (44.72)	50.00 (44.72)	30.00 (40.00)
omim_diabetes	6.82 (6.28)	3.48 (4.27)	8.79 (5.28)	3.48 (4.27)	1.82 (3.64)	3.48 (4.27)	10.45 (9.92)	5.15 (6.75)	5.15 (6.75)	5.30 (4.34)	6.82 (6.28)
omim_diamond_blackfan	50.00 (44.72)	0.00 (0.00)	0.00 (0.00)	30.00 (40.00)	0.00 (0.00)	0.00 (0.00)	0.00 (0.00)	20.00 (40.00)	20.00 (40.00)	0.00 (0.00)	50.00 (44.72)
omim_dystonia	0.00 (0.00)	0.00 (0.00)	0.00 (0.00)	0.00 (0.00)	6.67 (13.33)	13.33 (16.33)	16.67 (21.08)	0.00 (0.00)	0.00 (0.00)	0.00 (0.00)	0.00 (0.00)
omim_ectodermal	40.00 (22.61)	30.00 (26.67)	26.67 (32.66)	36.67 (30.55)	10.00 (20.00)	33.33 (18.26)	40.00 (22.61)	43.33 (38.87)	43.33 (38.87)	53.33 (32.32)	40.00 (22.61)
omim_epidermolysis	56.67 (32.66)	50.00 (25.82)	53.33 (33.99)	63.33 (22.11)	6.67 (13.33)	50.00 (14.91)	70.00 (26.67)	76.67 (29.06)	70.00 (26.67)	70.00 (26.67)	63.33 (22.11)
omim_epilepsy	19.33 (1.33)	23.33 (8.43)	15.33 (7.77)	15.33 (7.77)	11.33 (9.33)	11.33 (9.33)	19.33 (1.33)	19.33 (1.33)	19.33 (1.33)	19.33 (1.33)	19.33 (1.33)
omim_epileptic	0.00 (0.00)	0.00 (0.00)	0.00 (0.00)	0.00 (0.00)	0.00 (0.00)	0.00 (0.00)	0.00 (0.00)	0.00 (0.00)	0.00 (0.00)	0.00 (0.00)	0.00 (0.00)
omim_epiphyseal	70.00 (24.49)	70.00 (24.49)	60.00 (20.00)	60.00 (20.00)	10.00 (20.00)	30.00 (24.49)	60.00 (20.00)	70.00 (24.49)	70.00 (24.49)	70.00 (24.49)	70.00 (24.49)
omim_esophageal	0.00 (0.00)	0.00 (0.00)	0.00 (0.00)	0.00 (0.00)	0.00 (0.00)	0.00 (0.00)	0.00 (0.00)	0.00 (0.00)	0.00 (0.00)	0.00 (0.00)	0.00 (0.00)
omim_factor	80.00 (24.49)	80.00 (24.49)	50.00 (31.62)	80.00 (24.49)	20.00 (40.00)	30.00 (40.00)	60.00 (37.42)	80.00 (24.49)	80.00 (24.49)	70.00 (40.00)	80.00 (24.49)
omim_fanconi	47.00 (19.65)	52.00 (16.31)	43.00 (18.60)	52.00 (16.31)	15.00 (12.25)	43.00 (18.60)	43.00 (18.60)	47.00 (19.65)	47.00 (19.65)	47.00 (19.65)	57.00 (9.80)
omim_gastric	6.67 (13.33)	0.00 (0.00)	0.00 (0.00)	5.00 (10.00)	0.00 (0.00)	0.00 (0.00)	0.00 (0.00)	0.00 (0.00)	0.00 (0.00)	0.00 (0.00)	6.67 (13.33)
omim_glomerulosclerosis	0.00 (0.00)	0.00 (0.00)	0.00 (0.00)	0.00 (0.00)	0.00 (0.00)	0.00 (0.00)	0.00 (0.00)	0.00 (0.00)	0.00 (0.00)	0.00 (0.00)	0.00 (0.00)
omim_glycogen	18.33 (15.28)	11.67 (14.53)	0.00 (0.00)	0.00 (0.00)	0.00 (0.00)	0.00 (0.00)	0.00 (0.00)	11.67 (14.53)	11.67 (14.53)	0.00 (0.00)	11.67 (14.53)
omim_hemolytic	32.00 (19.39)	32.00 (19.39)	32.00 (19.39)	27.00 (17.20)	9.00 (11.14)	9.00 (11.14)	27.00 (17.20)	32.00 (19.39)	32.00 (19.39)	27.00 (17.20)	32.00 (19.39)
omim_hemophagocytic	30.00 (40.00)	30.00 (40.00)	40.00 (37.42)	40.00 (37.42)	0.00 (0.00)	0.00 (0.00)	40.00 (37.42)	40.00 (37.42)	40.00 (37.42)	40.00 (37.42)	30.00 (40.00)
omim_hepatocellular	0.00 (0.00)	0.00 (0.00)	0.00 (0.00)	10.00 (20.00)	20.00 (24.49)	20.00 (24.49)	20.00 (24.49)	0.00 (0.00)	0.00 (0.00)	20.00 (24.49)	0.00 (0.00)
omim_high	50.00 (31.62)	30.00 (40.00)	30.00 (40.00)	30.00 (40.00)	0.00 (0.00)	10.00 (20.00)	30.00 (40.00)	40.00 (37.42)	40.00 (37.42)	30.00 (40.00)	50.00 (31.62)
omim_hypercholesterolemia	40.00 (8.16)	40.00 (8.16)	33.33 (18.26)	40.00 (8.16)	6.67 (13.33)	6.67 (13.33)	33.33 (18.26)	40.00 (8.16)	40.00 (8.16)	33.33 (18.26)	40.00 (8.16)
omim_hypertension	20.00 (24.49)	30.00 (24.49)	20.00 (24.49)	20.00 (24.49)	0.00 (0.00)	0.00 (0.00)	20.00 (24.49)	20.00 (24.49)	20.00 (24.49)	20.00 (24.49)	20.00 (24.49)
omim_ichthyosis	11.67 (14.53)	6.67 (13.33)	0.00 (0.00)	0.00 (0.00)	0.00 (0.00)	0.00 (0.00)	0.00 (0.00)	0.00 (0.00)	0.00 (0.00)	0.00 (0.00)	0.00 (0.00)
omim_immunodeficiency	7.33 (9.04)	7.33 (9.04)	4.00 (8.00)	20.00 (17.89)	0.00 (0.00)	8.00 (16.00)	12.00 (16.00)	7.33 (9.04)	11.33 (9.33)	12.00 (16.00)	4.00 (8.00)
omim_keratosis	50.00 (31.62)	50.00 (31.62)	10.00 (20.00)	20.00 (24.49)	0.00 (0.00)	0.00 (0.00)	20.00 (24.49)	30.00 (24.49)	30.00 (24.49)	20.00 (24.49)	50.00 (31.62)
omim_leigh	10.00 (20.00)	20.00 (24.49)	0.00 (0.00)	0.00 (0.00)	0.00 (0.00)	0.00 (0.00)	0.00 (0.00)	10.00 (20.00)	10.00 (20.00)	0.00 (0.00)	10.00 (20.00)
omim_leukemia	1.54 (3.08)	1.54 (3.08)	12.56 (9.11)	4.62 (6.15)	1.67 (3.33)	1.67 (3.33)	3.08 (3.77)	1.54 (3.08)	1.54 (3.08)	4.74 (3.88)	3.08 (3.77)
omim_long	36.67 (37.12)	43.33 (32.66)	36.67 (22.11)	50.00 (33.33)	10.00 (20.00)	16.67 (21.08)	50.00 (33.33)	50.00 (33.33)	50.00 (33.33)	50.00 (33.33)	50.00 (33.33)
omim_lung	6.67 (13.33)	0.00 (0.00)	0.00 (0.00)	0.00 (0.00)	0.00 (0.00)	0.00 (0.00)	0.00 (0.00)	0.00 (0.00)	0.00 (0.00)	0.00 (0.00)	6.67 (13.33)
omim_lymphoma	0.00 (0.00)	0.00 (0.00)	0.00 (0.00)	0.00 (0.00)	0.00 (0.00)	0.00 (0.00)	0.00 (0.00)	0.00 (0.00)	0.00 (0.00)	0.00 (0.00)	0.00 (0.00)
omim_macular	44.00 (14.97)	40.00 (12.65)	12.00 (16.00)	32.00 (20.40)	12.00 (9.80)	24.00 (8.00)	40.00 (12.65)	36.00 (14.97)	40.00 (12.65)	44.00 (14.97)	48.00 (16.00)
omim_malaria	0.00 (0.00)	0.00 (0.00)	0.00 (0.00)	0.00 (0.00)	0.00 (0.00)	0.00 (0.00)	0.00 (0.00)	0.00 (0.00)	0.00 (0.00)	0.00 (0.00)	0.00 (0.00)
omim_melanoma	0.00 (0.00)	0.00 (0.00)	16.67 (21.08)	16.67 (21.08)	0.00 (0.00)	0.00 (0.00)	0.00 (0.00)	16.67 (21.08)	16.67 (21.08)	10.00 (20.00)	0.00 (0.00)
omim_mental	0.00 (0.00)	0.00 (0.00)	9.81 (8.48)	2.86 (3.50)	0.00 (0.00)	0.00 (0.00)	0.00 (0.00)	0.00 (0.00)	1.33 (2.67)	0.00 (0.00)	0.00 (0.00)
omim_microcephaly	0.00 (0.00)	0.00 (0.00)	0.00 (0.00)	0.00 (0.00)	0.00 (0.00)	0.00 (0.00)	0.00 (0.00)	0.00 (0.00)	0.00 (0.00)	0.00 (0.00)	0.00 (0.00)
omim_microphthalmia	10.00 (20.00)	0.00 (0.00)	0.00 (0.00)	0.00 (0.00)	0.00 (0.00)	0.00 (0.00)	0.00 (0.00)	0.00 (0.00)	0.00 (0.00)	0.00 (0.00)	10.00 (20.00)
omim_microvascular	0.00 (0.00)	0.00 (0.00)	0.00 (0.00)	0.00 (0.00)	0.00 (0.00)	0.00 (0.00)	0.00 (0.00)	0.00 (0.00)	0.00 (0.00)	0.00 (0.00)	0.00 (0.00)
omim_mitochondrial	8.00 (9.80)	12.00 (9.80)	4.00 (8.00)	8.00 (9.80)	4.00 (8.00)	4.00 (8.00)	8.00 (9.80)	4.00 (8.00)	8.00 (9.80)	8.00 (9.80)	8.00 (9.80)
omim_multiple	20.00 (18.71)	15.00 (12.25)	5.00 (10.00)	20.00 (18.71)	25.00 (22.36)	20.00 (18.71)	20.00 (18.71)	15.00 (12.25)	15.00 (12.25)	20.00 (18.71)	20.00 (18.71)
omim_muscular	73.33 (16.16)	73.33 (16.16)	68.33 (18.56)	61.67 (10.00)	33.33 (9.13)	50.00 (10.54)	68.33 (18.56)	68.33 (18.56)	68.33 (18.56)	61.67 (10.00)	73.33 (16.16)
omim_myasthenic	70.00 (24.49)	70.00 (24.49)	60.00 (37.42)	70.00 (24.49)	50.00 (31.62)	70.00 (24.49)	70.00 (24.49)	70.00 (24.49)	70.00 (24.49)	70.00 (24.49)	70.00 (24.49)
omim_myocardial	6.67 (13.33)	13.33 (16.33)	13.33 (26.67)	13.33 (16.33)	13.33 (16.33)	13.33 (16.33)	36.67 (22.11)	20.00 (26.67)	20.00 (26.67)	20.00 (16.33)	20.00 (16.33)
omim_myopathy	4.00 (8.00)	12.00 (16.00)	12.00 (9.80)	12.00 (9.80)	4.00 (8.00)	8.00 (9.80)	8.00 (9.80)	16.00 (14.97)	16.00 (14.97)	12.00 (9.80)	8.00 (9.80)
omim_neuropathy	19.00 (9.70)	19.00 (9.70)	5.00 (10.00)	14.00 (11.58)	10.00 (12.25)	25.00 (22.36)	34.00 (20.59)	19.00 (18.55)	24.00 (15.94)	24.00 (15.94)	24.00 (15.94)
omim_noonan	10.00 (20.00)	10.00 (20.00)	23.33 (20.00)	16.67 (21.08)	23.33 (20.00)	16.67 (21.08)	6.67 (13.33)	10.00 (20.00)	10.00 (20.00)	33.33 (36.51)	10.00 (20.00)
omim_obesity	24.00 (23.32)	24.00 (23.32)	0.00 (0.00)	29.00 (15.62)	20.00 (21.91)	28.00 (27.13)	36.00 (32.00)	28.00 (24.00)	28.00 (24.00)	24.00 (23.32)	28.00 (24.00)
omim_osteopetrosis	0.00 (0.00)	0.00 (0.00)	30.00 (40.00)	30.00 (40.00)	0.00 (0.00)	0.00 (0.00)	30.00 (40.00)	30.00 (40.00)	30.00 (40.00)	0.00 (0.00)	30.00 (40.00)
omim_ovarian	0.00 (0.00)	0.00 (0.00)	0.00 (0.00)	6.67 (13.33)	20.00 (16.33)	20.00 (16.33)	6.67 (13.33)	0.00 (0.00)	0.00 (0.00)	20.00 (16.33)	0.00 (0.00)
omim_pancreatic	0.00 (0.00)	0.00 (0.00)	16.67 (21.08)	20.00 (26.67)	25.00 (24.72)	25.00 (24.72)	11.67 (14.53)	0.00 (0.00)	0.00 (0.00)	25.00 (24.72)	0.00 (0.00)
omim_parkinson	0.00 (0.00)	0.00 (0.00)	10.00 (20.00)	26.67 (22.61)	10.00 (20.00)	0.00 (0.00)	16.67 (21.08)	10.00 (20.00)	10.00 (20.00)	10.00 (20.00)	0.00 (0.00)
omim_pituitary	20.00 (24.49)	20.00 (24.49)	6.67 (13.33)	20.00 (24.49)	26.67 (22.61)	26.67 (22.61)	26.67 (22.61)	26.67 (22.61)	26.67 (22.61)	26.67 (22.61)	26.67 (22.61)
omim_prostate	0.00 (0.00)	0.00 (0.00)	10.00 (13.33)	3.33 (6.67)	6.67 (8.16)	3.33 (6.67)	0.00 (0.00)	0.00 (0.00)	0.00 (0.00)	6.67 (8.16)	0.00 (0.00)
omim_pulmonary	6.67 (13.33)	11.67 (14.53)	0.00 (0.00)	6.67 (13.33)	11.67 (14.53)	18.33 (26.03)	11.67 (14.53)	6.67 (13.33)	6.67 (13.33)	18.33 (26.03)	11.67 (14.53)
omim_renal	5.00 (10.00)	5.00 (10.00)	0.00 (0.00)	13.00 (10.77)	4.00 (8.00)	8.00 (9.80)	16.00 (14.97)	5.00 (10.00)	9.00 (11.14)	9.00 (11.14)	5.00 (10.00)
omim_retinitis	14.22 (7.90)	14.22 (7.90)	4.00 (4.90)	12.22 (3.91)	2.00 (4.00)	10.22 (6.34)	16.22 (4.64)	12.22 (3.91)	12.22 (3.91)	10.22 (0.44)	14.22 (7.90)
omim_rheumatoid	11.67 (14.53)	11.67 (14.53)	15.00 (12.25)	16.67 (13.94)	0.00 (0.00)	6.67 (13.33)	21.67 (11.30)	16.67 (13.94)	16.67 (13.94)	11.67 (14.53)	16.67 (13.94)
omim_schizophrenia	0.00 (0.00)	0.00 (0.00)	0.00 (0.00)	0.00 (0.00)	10.00 (20.00)	10.00 (20.00)	0.00 (0.00)	0.00 (0.00)	0.00 (0.00)	0.00 (0.00)	0.00 (0.00)
omim_severe	46.67 (33.99)	53.33 (26.67)	36.67 (22.11)	53.33 (33.99)	0.00 (0.00)	30.00 (16.33)	66.67 (29.81)	36.67 (22.11)	43.33 (24.94)	26.67 (24.94)	66.67 (29.81)
omim_short	10.00 (20.00)	0.00 (0.00)	0.00 (0.00)	10.00 (20.00)	0.00 (0.00)	0.00 (0.00)	0.00 (0.00)	0.00 (0.00)	0.00 (0.00)	0.00 (0.00)	10.00 (20.00)
omim_spastic	0.00 (0.00)	0.00 (0.00)	0.00 (0.00)	0.00 (0.00)	0.00 (0.00)	0.00 (0.00)	0.00 (0.00)	0.00 (0.00)	0.00 (0.00)	0.00 (0.00)	0.00 (0.00)
omim_spinocerebellar	0.00 (0.00)	0.00 (0.00)	5.00 (10.00)	0.00 (0.00)	8.00 (9.80)	4.00 (8.00)	4.00 (8.00)	0.00 (0.00)	0.00 (0.00)	4.00 (8.00)	0.00 (0.00)
omim_systemic	11.67 (14.53)	11.67 (14.53)	0.00 (0.00)	0.00 (0.00)	0.00 (0.00)	0.00 (0.00)	0.00 (0.00)	5.00 (10.00)	5.00 (10.00)	0.00 (0.00)	5.00 (10.00)
omim_thrombophilia	36.67 (11.30)	53.33 (17.16)	36.67 (19.44)	48.33 (20.68)	10.00 (12.25)	15.00 (12.25)	43.33 (16.16)	53.33 (17.16)	53.33 (17.16)	48.33 (20.68)	53.33 (17.16)
omim_thyroid	0.00 (0.00)	0.00 (0.00)	0.00 (0.00)	4.00 (8.00)	0.00 (0.00)	3.33 (6.67)	7.33 (9.04)	4.00 (8.00)	4.00 (8.00)	0.00 (0.00)	0.00 (0.00)
omim_usher	80.00 (40.00)	80.00 (40.00)	70.00 (40.00)	80.00 (40.00)	50.00 (44.72)	50.00 (44.72)	80.00 (40.00)	80.00 (40.00)	80.00 (40.00)	80.00 (40.00)	80.00 (40.00)
omim_xeroderma	80.00 (24.49)	80.00 (24.49)	70.00 (24.49)	70.00 (24.49)	0.00 (0.00)	40.00 (37.42)	70.00 (24.49)	70.00 (24.49)	70.00 (24.49)	70.00 (24.49)	80.00 (24.49)
omim_zellweger	90.00 (20.00)	90.00 (20.00)	73.33 (22.61)	90.00 (20.00)	50.00 (44.72)	70.00 (24.49)	90.00 (20.00)	90.00 (20.00)	90.00 (20.00)	90.00 (20.00)	90.00 (20.00)

## Sheet: PPI
	NetScore	NetZcore	NetShort	Func. Flow	PageRank	Random walk	Network propagation	NetCombo (NetScore + NetZcore + NetShort)	NetScore + NetZcore + NetShort + Network Propogation	All 7	NetScore + Network Propogation
chen_atherosclerosis	13.57 (15.67)	5.71 (7.00)	2.86 (5.71)	7.86 (10.20)	0.00 (0.00)	2.50 (5.00)	5.00 (10.00)	13.93 (15.67)	16.43 (16.23)	16.43 (16.23)	7.86 (6.45)
chen_autism	25.28 (18.89)	25.28 (18.89)	0.00 (0.00)	13.61 (16.30)	2.22 (4.44)	9.17 (8.41)	11.39 (12.18)	27.50 (22.61)	27.50 (22.61)	27.50 (22.61)	25.28 (18.89)
chen_cervical_carcinoma	42.44 (11.24)	35.90 (9.05)	1.67 (3.33)	16.28 (11.54)	10.00 (6.24)	15.00 (12.25)	27.95 (8.68)	41.03 (11.85)	41.03 (11.85)	39.36 (9.69)	34.49 (9.86)
chen_cirrhosis	17.62 (5.55)	14.76 (0.95)	0.00 (0.00)	6.19 (7.62)	0.00 (0.00)	5.71 (7.00)	11.90 (6.02)	20.95 (8.30)	23.81 (7.97)	23.81 (7.97)	17.62 (5.55)
chen_endometrial_carcinoma	12.50 (7.91)	7.50 (10.00)	7.50 (10.00)	0.00 (0.00)	12.50 (11.18)	15.00 (5.00)	15.00 (5.00)	5.00 (6.12)	7.50 (10.00)	7.50 (10.00)	12.50 (11.18)
chen_endometriosis	23.43 (10.45)	12.48 (6.94)	0.00 (0.00)	2.67 (5.33)	6.95 (4.52)	11.24 (8.67)	17.90 (11.89)	15.14 (5.27)	15.14 (5.27)	16.48 (5.48)	16.57 (5.79)
chen_epilepsy	36.11 (10.24)	31.67 (7.78)	4.44 (5.44)	11.11 (9.94)	0.00 (0.00)	2.22 (4.44)	15.83 (5.24)	29.44 (13.10)	29.44 (13.10)	31.67 (10.48)	36.11 (10.24)
chen_graves_disease	26.67 (12.25)	13.33 (6.67)	1.67 (3.33)	13.33 (10.00)	3.33 (4.08)	8.33 (9.13)	16.67 (5.27)	25.00 (11.79)	25.00 (11.79)	25.00 (11.79)	18.33 (12.25)
chen_hypercholesterolaemia	37.33 (18.79)	20.00 (19.44)	21.33 (14.08)	21.33 (20.50)	14.00 (7.12)	20.67 (16.25)	34.00 (9.52)	38.00 (19.39)	38.00 (19.39)	44.67 (19.50)	40.67 (21.95)
chen_inflammatory_bowel_disease	33.33 (18.59)	24.44 (8.31)	4.44 (5.44)	11.11 (7.03)	0.00 (0.00)	17.78 (11.33)	28.89 (11.33)	31.11 (14.74)	31.11 (14.74)	28.89 (15.07)	31.11 (19.12)
chen_ischaemic_stroke	18.95 (6.61)	15.05 (8.38)	5.43 (5.02)	6.76 (7.31)	5.43 (2.72)	8.19 (5.20)	13.62 (6.30)	18.95 (5.10)	17.62 (6.93)	19.05 (8.19)	16.29 (8.16)
chen_lymphoma	26.67 (9.45)	12.67 (7.91)	1.25 (2.50)	1.33 (2.67)	6.33 (3.96)	10.17 (6.45)	20.33 (7.54)	17.75 (8.34)	15.08 (11.53)	16.33 (11.52)	20.33 (7.54)
chen_migraine	2.86 (5.71)	2.50 (5.00)	0.00 (0.00)	0.00 (0.00)	2.50 (5.00)	5.36 (6.59)	5.36 (6.59)	2.50 (5.00)	2.50 (5.00)	2.50 (5.00)	2.86 (5.71)
chen_myocardial_ischemia	19.17 (10.63)	11.67 (0.68)	9.17 (8.41)	4.44 (5.44)	2.22 (4.44)	2.22 (4.44)	6.94 (5.69)	16.39 (5.98)	16.39 (5.98)	16.39 (5.98)	16.67 (10.43)
chen_neural_tube_defects	18.00 (10.67)	7.33 (9.04)	0.00 (0.00)	0.00 (0.00)	0.00 (0.00)	4.00 (8.00)	14.67 (7.48)	10.67 (13.73)	10.67 (13.73)	10.67 (13.73)	18.00 (10.67)
chen_osteoarthritis	39.09 (15.00)	23.64 (10.37)	9.82 (6.33)	19.82 (17.99)	7.82 (7.44)	23.82 (13.76)	35.27 (10.01)	33.27 (11.72)	35.27 (10.01)	37.27 (7.43)	37.45 (8.12)
chen_pancreatitis	45.64 (12.07)	20.91 (7.36)	1.82 (3.64)	0.00 (0.00)	11.45 (7.17)	15.45 (10.19)	26.73 (11.52)	34.00 (9.37)	34.18 (9.99)	36.00 (7.40)	36.18 (11.79)
chen_systemic_scleroderma	32.00 (9.59)	27.56 (4.52)	4.22 (5.18)	27.78 (11.42)	12.44 (7.38)	18.89 (12.25)	32.22 (10.52)	34.00 (7.75)	38.44 (9.15)	38.44 (9.15)	32.00 (9.59)
chen_ulcerative_colitis	20.44 (12.68)	20.44 (6.39)	0.00 (0.00)	2.00 (4.00)	6.00 (8.00)	12.22 (7.44)	24.44 (13.46)	22.67 (13.73)	22.44 (9.75)	22.44 (9.75)	20.44 (12.68)
goh_bone	18.89 (8.81)	16.94 (9.64)	2.50 (5.00)	7.50 (6.12)	4.72 (5.80)	12.22 (7.93)	16.94 (6.60)	19.17 (11.67)	11.94 (7.06)	14.44 (8.81)	18.89 (8.81)
goh_cancer	2.01 (1.25)	1.34 (1.25)	2.01 (1.63)	0.00 (0.00)	0.00 (0.00)	0.00 (0.00)	0.00 (0.00)	1.34 (1.25)	1.01 (0.82)	0.00 (0.00)	0.67 (0.82)
goh_cardiovascular	4.62 (5.65)	4.62 (5.65)	1.54 (1.88)	0.00 (0.00)	0.77 (1.54)	1.54 (1.88)	3.85 (2.43)	4.62 (5.65)	2.31 (3.08)	0.77 (1.54)	0.00 (0.00)
goh_connective_tissue	12.06 (7.91)	8.46 (6.35)	0.00 (0.00)	3.60 (2.94)	1.18 (2.35)	3.60 (2.94)	7.21 (2.29)	8.46 (6.35)	5.96 (3.72)	5.96 (3.72)	6.03 (5.43)
goh_dermatological	12.38 (6.46)	7.62 (6.46)	3.81 (3.56)	7.62 (4.86)	1.90 (2.33)	4.76 (3.01)	9.52 (6.73)	9.52 (5.22)	8.57 (3.56)	10.48 (5.55)	9.52 (7.97)
goh_developmental	11.24 (8.67)	6.86 (4.22)	2.76 (3.39)	0.00 (0.00)	4.10 (3.35)	9.62 (3.44)	12.29 (2.60)	11.24 (8.67)	6.95 (4.52)	6.95 (4.52)	5.52 (2.77)
goh_ear,nose,throat	13.57 (12.04)	8.21 (6.74)	5.71 (7.00)	0.00 (0.00)	8.21 (6.74)	8.21 (6.74)	10.71 (9.58)	16.43 (16.23)	13.57 (12.04)	16.43 (10.00)	13.57 (12.04)
goh_endocrine	10.73 (1.97)	14.00 (3.99)	3.30 (3.11)	0.00 (0.00)	0.83 (1.67)	4.10 (3.65)	4.93 (3.05)	11.53 (2.91)	4.13 (2.64)	4.13 (2.64)	4.97 (1.68)
goh_gastrointestinal	25.33 (25.44)	26.00 (24.98)	3.33 (6.67)	10.67 (13.73)	7.33 (9.04)	15.33 (14.85)	26.00 (24.98)	18.00 (22.27)	18.00 (22.27)	22.00 (20.40)	25.33 (25.44)
goh_hematological	16.50 (4.36)	17.50 (4.18)	1.00 (1.22)	0.00 (0.00)	0.00 (0.00)	0.00 (0.00)	0.00 (0.00)	18.00 (3.67)	13.50 (5.15)	0.50 (1.00)	3.00 (2.45)
goh_immunological	7.56 (5.96)	9.34 (4.67)	0.00 (0.00)	0.00 (0.00)	0.00 (0.00)	0.00 (0.00)	0.00 (0.00)	9.34 (4.67)	5.24 (4.28)	1.75 (1.43)	2.34 (1.17)
goh_metabolic	7.42 (4.05)	7.42 (2.99)	0.70 (1.40)	0.00 (0.00)	0.00 (0.00)	0.00 (0.00)	0.00 (0.00)	7.07 (2.45)	4.59 (2.37)	2.12 (1.32)	2.12 (1.32)
goh_multiple	10.11 (4.79)	10.87 (4.14)	1.50 (1.41)	0.00 (0.00)	0.00 (0.00)	0.00 (0.00)	0.00 (0.00)	10.49 (4.16)	8.60 (4.46)	1.13 (0.92)	5.61 (4.38)
goh_muscular	18.42 (4.95)	23.67 (8.97)	2.67 (3.27)	1.25 (2.50)	7.83 (4.82)	9.25 (3.34)	26.17 (10.59)	21.00 (8.67)	19.67 (9.21)	22.33 (8.92)	18.42 (4.95)
goh_neurological	1.94 (1.88)	2.58 (1.64)	0.97 (1.29)	0.00 (0.00)	0.00 (0.00)	0.00 (0.00)	0.00 (0.00)	1.94 (1.88)	1.29 (1.88)	0.00 (0.00)	0.00 (0.00)
goh_nutritional	32.00 (20.40)	36.00 (19.60)	20.00 (17.89)	48.00 (16.00)	28.00 (20.40)	36.00 (23.32)	44.00 (26.53)	36.00 (19.60)	36.00 (19.60)	40.00 (21.91)	36.00 (23.32)
goh_ophthamological	13.75 (6.59)	15.10 (9.19)	1.36 (1.66)	0.69 (1.38)	2.02 (2.68)	2.74 (1.37)	5.45 (3.42)	14.41 (8.02)	10.28 (4.36)	4.11 (2.59)	5.49 (4.15)
goh_psychiatric	0.00 (0.00)	0.00 (0.00)	2.86 (5.71)	0.00 (0.00)	0.00 (0.00)	3.33 (6.67)	0.00 (0.00)	0.00 (0.00)	0.00 (0.00)	0.00 (0.00)	0.00 (0.00)
goh_renal	18.50 (9.89)	13.08 (8.25)	1.33 (2.67)	0.00 (0.00)	5.25 (4.97)	6.50 (5.78)	10.50 (6.74)	14.42 (4.74)	13.08 (5.70)	14.42 (6.34)	11.92 (6.60)
goh_respiratory	11.94 (7.93)	12.22 (7.93)	9.44 (4.76)	2.50 (5.00)	2.50 (5.00)	14.44 (9.53)	24.17 (8.41)	16.94 (6.60)	16.94 (6.60)	16.94 (6.60)	11.94 (7.93)
goh_skeletal	12.09 (7.77)	7.47 (6.64)	2.86 (5.71)	4.40 (5.77)	4.40 (5.77)	5.93 (7.28)	4.51 (6.10)	7.47 (6.64)	4.40 (5.77)	5.93 (5.41)	5.93 (7.28)
omim_adrenoleukodystrophy	90.00 (20.00)	90.00 (20.00)	70.00 (40.00)	90.00 (20.00)	40.00 (37.42)	40.00 (37.42)	80.00 (24.49)	90.00 (20.00)	90.00 (20.00)	90.00 (20.00)	90.00 (20.00)
omim_aids	20.00 (40.00)	20.00 (40.00)	0.00 (0.00)	0.00 (0.00)	0.00 (0.00)	0.00 (0.00)	0.00 (0.00)	20.00 (40.00)	20.00 (40.00)	0.00 (0.00)	20.00 (40.00)
omim_alzheimer	6.67 (13.33)	11.67 (14.53)	35.00 (16.16)	33.33 (9.13)	5.00 (10.00)	11.67 (14.53)	28.33 (16.33)	30.00 (21.47)	30.00 (21.47)	28.33 (16.33)	6.67 (13.33)
omim_amyloidosis	0.00 (0.00)	10.00 (20.00)	40.00 (37.42)	40.00 (37.42)	10.00 (20.00)	0.00 (0.00)	30.00 (40.00)	10.00 (20.00)	10.00 (20.00)	30.00 (40.00)	0.00 (0.00)
omim_amyotrophic	0.00 (0.00)	0.00 (0.00)	0.00 (0.00)	0.00 (0.00)	0.00 (0.00)	0.00 (0.00)	0.00 (0.00)	0.00 (0.00)	0.00 (0.00)	0.00 (0.00)	0.00 (0.00)
omim_anemia	0.00 (0.00)	0.00 (0.00)	0.00 (0.00)	0.00 (0.00)	0.00 (0.00)	0.00 (0.00)	0.00 (0.00)	0.00 (0.00)	0.00 (0.00)	0.00 (0.00)	0.00 (0.00)
omim_arrhythmogenic	40.00 (48.99)	40.00 (48.99)	60.00 (37.42)	40.00 (37.42)	20.00 (24.49)	20.00 (24.49)	60.00 (37.42)	50.00 (44.72)	60.00 (37.42)	60.00 (37.42)	50.00 (44.72)
omim_asthma	5.00 (10.00)	5.00 (10.00)	18.33 (15.28)	18.33 (15.28)	0.00 (0.00)	6.67 (13.33)	18.33 (15.28)	11.67 (14.53)	11.67 (14.53)	18.33 (15.28)	11.67 (14.53)
omim_atrial	31.67 (29.06)	31.67 (18.56)	0.00 (0.00)	0.00 (0.00)	0.00 (0.00)	10.00 (12.25)	26.67 (16.16)	21.67 (19.44)	21.67 (19.44)	26.67 (16.16)	36.67 (25.06)
omim_autism	6.67 (13.33)	6.67 (13.33)	16.67 (21.08)	0.00 (0.00)	0.00 (0.00)	0.00 (0.00)	0.00 (0.00)	0.00 (0.00)	0.00 (0.00)	0.00 (0.00)	0.00 (0.00)
omim_autoimmune	0.00 (0.00)	0.00 (0.00)	13.33 (16.33)	6.67 (13.33)	6.67 (13.33)	6.67 (13.33)	6.67 (13.33)	6.67 (13.33)	6.67 (13.33)	13.33 (26.67)	6.67 (13.33)
omim_bardet_biedl	63.33 (15.46)	35.00 (8.16)	0.00 (0.00)	48.33 (17.00)	11.67 (14.53)	11.67 (14.53)	35.00 (8.16)	28.33 (16.33)	28.33 (16.33)	16.67 (21.08)	75.00 (12.91)
omim_blood	11.39 (7.05)	11.39 (7.05)	2.22 (4.44)	0.00 (0.00)	2.22 (4.44)	4.72 (5.80)	9.72 (9.30)	11.67 (0.68)	11.67 (0.68)	6.94 (5.69)	13.89 (4.21)
omim_brachydactyly	40.00 (37.42)	40.00 (37.42)	40.00 (37.42)	40.00 (37.42)	0.00 (0.00)	20.00 (24.49)	40.00 (37.42)	40.00 (37.42)	40.00 (37.42)	40.00 (37.42)	40.00 (37.42)
omim_breast	5.71 (7.00)	2.86 (5.71)	14.76 (12.81)	17.62 (5.55)	9.05 (11.70)	9.05 (11.70)	11.90 (6.02)	5.71 (7.00)	5.71 (7.00)	11.90 (10.86)	8.57 (11.43)
omim_cardiomyopathy	6.67 (6.24)	6.67 (6.24)	1.67 (3.33)	3.33 (6.67)	8.33 (7.45)	11.67 (6.67)	13.33 (6.67)	6.67 (6.24)	6.67 (6.24)	8.33 (5.27)	6.67 (6.24)
omim_cataract	34.00 (9.04)	30.00 (9.89)	3.33 (6.67)	26.00 (9.04)	32.67 (11.62)	36.67 (9.89)	48.67 (10.67)	30.00 (9.89)	33.33 (7.30)	32.67 (11.62)	41.33 (9.80)
omim_cerebral	25.00 (22.36)	25.00 (22.36)	0.00 (0.00)	10.00 (12.25)	10.00 (12.25)	40.00 (20.00)	35.00 (25.50)	30.00 (18.71)	30.00 (18.71)	45.00 (24.49)	30.00 (18.71)
omim_charcot_marie_tooth	10.00 (12.25)	7.50 (10.00)	5.00 (10.00)	0.00 (0.00)	5.00 (10.00)	7.50 (6.12)	17.86 (9.85)	15.00 (14.58)	15.00 (14.58)	12.50 (11.18)	10.00 (12.25)
omim_colon	0.00 (0.00)	0.00 (0.00)	10.00 (20.00)	0.00 (0.00)	10.00 (20.00)	10.00 (20.00)	10.00 (20.00)	0.00 (0.00)	0.00 (0.00)	10.00 (20.00)	0.00 (0.00)
omim_colorectal	10.36 (9.48)	5.36 (6.59)	15.36 (4.87)	2.50 (5.00)	15.36 (9.29)	26.07 (9.69)	28.21 (9.27)	12.86 (13.71)	12.86 (11.20)	23.57 (11.15)	15.36 (14.53)
omim_combined	24.00 (14.97)	20.00 (12.65)	0.00 (0.00)	0.00 (0.00)	4.00 (8.00)	20.00 (21.91)	24.00 (19.60)	12.00 (16.00)	16.00 (14.97)	12.00 (16.00)	28.00 (20.40)
omim_cone_rod	33.00 (15.36)	21.00 (12.81)	5.00 (10.00)	25.00 (23.24)	16.00 (14.97)	16.00 (14.97)	41.00 (16.85)	13.00 (10.77)	13.00 (10.77)	25.00 (7.75)	37.00 (18.87)
omim_congenital	24.00 (16.79)	20.67 (19.37)	0.00 (0.00)	20.67 (19.37)	17.33 (18.31)	17.33 (18.31)	20.67 (19.37)	20.67 (19.37)	20.67 (19.37)	20.67 (19.37)	20.67 (19.37)
omim_coronary	5.00 (10.00)	10.00 (12.25)	5.00 (10.00)	5.00 (10.00)	0.00 (0.00)	0.00 (0.00)	10.00 (12.25)	0.00 (0.00)	0.00 (0.00)	0.00 (0.00)	10.00 (12.25)
omim_deafness	13.09 (12.23)	11.27 (8.84)	5.82 (7.92)	1.82 (3.64)	1.82 (3.64)	5.64 (7.37)	9.45 (5.77)	14.91 (7.01)	7.45 (6.86)	11.45 (7.17)	13.09 (12.23)
omim_dementia	30.00 (24.49)	30.00 (24.49)	36.67 (19.44)	56.67 (38.87)	10.00 (20.00)	26.67 (22.61)	86.67 (26.67)	50.00 (44.72)	50.00 (44.72)	56.67 (38.87)	40.00 (37.42)
omim_diabetes	5.00 (6.67)	6.67 (6.24)	0.00 (0.00)	0.00 (0.00)	1.67 (3.33)	6.67 (6.24)	13.33 (8.50)	8.33 (10.54)	8.33 (10.54)	3.33 (4.08)	6.67 (6.24)
omim_diamond_blackfan	10.00 (20.00)	0.00 (0.00)	23.33 (29.06)	6.67 (13.33)	0.00 (0.00)	0.00 (0.00)	20.00 (24.49)	33.33 (27.89)	43.33 (22.61)	10.00 (20.00)	20.00 (24.49)
omim_dystonia	0.00 (0.00)	0.00 (0.00)	13.33 (16.33)	13.33 (16.33)	6.67 (13.33)	6.67 (13.33)	0.00 (0.00)	0.00 (0.00)	0.00 (0.00)	6.67 (13.33)	0.00 (0.00)
omim_ectodermal	23.33 (20.00)	23.33 (20.00)	6.67 (13.33)	23.33 (20.00)	0.00 (0.00)	30.00 (26.67)	30.00 (26.67)	23.33 (20.00)	23.33 (20.00)	30.00 (26.67)	23.33 (20.00)
omim_epidermolysis	35.00 (22.61)	35.00 (22.61)	13.33 (16.33)	20.00 (26.67)	5.00 (10.00)	33.33 (18.26)	65.00 (22.61)	35.00 (22.61)	41.67 (33.33)	40.00 (22.61)	46.67 (32.32)
omim_epilepsy	22.67 (13.73)	26.67 (15.20)	10.67 (13.73)	18.67 (10.67)	8.00 (9.80)	16.00 (14.97)	22.67 (13.73)	22.67 (13.73)	22.67 (13.73)	22.67 (13.73)	22.67 (13.73)
omim_epileptic	0.00 (0.00)	0.00 (0.00)	6.67 (13.33)	0.00 (0.00)	6.67 (13.33)	0.00 (0.00)	0.00 (0.00)	6.67 (13.33)	6.67 (13.33)	6.67 (13.33)	0.00 (0.00)
omim_epiphyseal	70.00 (24.49)	70.00 (24.49)	60.00 (20.00)	70.00 (24.49)	10.00 (20.00)	30.00 (24.49)	60.00 (20.00)	70.00 (24.49)	70.00 (24.49)	70.00 (24.49)	70.00 (24.49)
omim_esophageal	0.00 (0.00)	0.00 (0.00)	0.00 (0.00)	0.00 (0.00)	0.00 (0.00)	0.00 (0.00)	0.00 (0.00)	0.00 (0.00)	0.00 (0.00)	0.00 (0.00)	0.00 (0.00)
omim_factor	81.67 (15.28)	81.67 (15.28)	56.67 (13.33)	70.00 (16.33)	20.00 (16.33)	50.00 (14.91)	76.67 (20.00)	76.67 (20.00)	76.67 (20.00)	76.67 (20.00)	88.33 (14.53)
omim_fanconi	50.00 (17.03)	50.00 (17.03)	40.00 (27.57)	50.00 (24.70)	28.00 (23.15)	50.00 (24.70)	55.00 (26.65)	51.00 (23.96)	55.00 (26.65)	50.00 (24.70)	46.00 (20.83)
omim_gastric	4.00 (8.00)	4.00 (8.00)	0.00 (0.00)	0.00 (0.00)	0.00 (0.00)	0.00 (0.00)	0.00 (0.00)	0.00 (0.00)	0.00 (0.00)	0.00 (0.00)	4.00 (8.00)
omim_glomerulosclerosis	0.00 (0.00)	0.00 (0.00)	0.00 (0.00)	0.00 (0.00)	10.00 (20.00)	0.00 (0.00)	0.00 (0.00)	0.00 (0.00)	0.00 (0.00)	0.00 (0.00)	0.00 (0.00)
omim_glycogen	26.67 (13.33)	26.67 (13.33)	0.00 (0.00)	13.33 (16.33)	6.67 (13.33)	20.00 (16.33)	20.00 (16.33)	20.00 (16.33)	20.00 (16.33)	20.00 (16.33)	26.67 (13.33)
omim_hemolytic	30.00 (16.06)	37.33 (13.06)	30.00 (9.89)	22.67 (8.79)	7.33 (9.04)	7.33 (9.04)	22.67 (8.79)	30.00 (9.89)	30.00 (9.89)	26.67 (10.95)	33.33 (14.61)
omim_hemophagocytic	20.00 (24.49)	20.00 (24.49)	30.00 (24.49)	30.00 (24.49)	0.00 (0.00)	10.00 (20.00)	30.00 (24.49)	30.00 (24.49)	30.00 (24.49)	30.00 (24.49)	30.00 (24.49)
omim_hepatocellular	0.00 (0.00)	0.00 (0.00)	10.00 (20.00)	20.00 (40.00)	30.00 (40.00)	30.00 (40.00)	20.00 (40.00)	0.00 (0.00)	0.00 (0.00)	20.00 (40.00)	0.00 (0.00)
omim_high	10.00 (20.00)	0.00 (0.00)	20.00 (24.49)	40.00 (37.42)	0.00 (0.00)	10.00 (20.00)	20.00 (24.49)	20.00 (24.49)	20.00 (24.49)	10.00 (20.00)	30.00 (24.49)
omim_hypercholesterolemia	13.33 (16.33)	13.33 (16.33)	13.33 (16.33)	26.67 (24.94)	6.67 (13.33)	6.67 (13.33)	20.00 (16.33)	13.33 (16.33)	13.33 (16.33)	13.33 (16.33)	13.33 (16.33)
omim_hypertension	23.33 (20.00)	30.00 (26.67)	23.33 (20.00)	36.67 (22.11)	0.00 (0.00)	0.00 (0.00)	23.33 (20.00)	23.33 (20.00)	23.33 (20.00)	23.33 (20.00)	23.33 (20.00)
omim_ichthyosis	0.00 (0.00)	0.00 (0.00)	30.00 (16.33)	23.33 (20.00)	11.67 (14.53)	0.00 (0.00)	23.33 (20.00)	0.00 (0.00)	0.00 (0.00)	16.67 (21.08)	0.00 (0.00)
omim_immunodeficiency	4.00 (8.00)	7.33 (9.04)	0.00 (0.00)	14.00 (12.72)	0.00 (0.00)	3.33 (6.67)	18.00 (10.67)	14.00 (12.72)	14.00 (12.72)	10.67 (13.73)	10.67 (8.79)
omim_keratosis	0.00 (0.00)	0.00 (0.00)	30.00 (24.49)	30.00 (24.49)	10.00 (20.00)	10.00 (20.00)	20.00 (24.49)	0.00 (0.00)	0.00 (0.00)	20.00 (24.49)	0.00 (0.00)
omim_leigh	20.00 (26.67)	13.33 (16.33)	0.00 (0.00)	0.00 (0.00)	0.00 (0.00)	13.33 (16.33)	26.67 (13.33)	13.33 (16.33)	13.33 (16.33)	13.33 (16.33)	20.00 (26.67)
omim_leukemia	5.00 (4.68)	5.00 (4.68)	5.00 (7.29)	0.00 (0.00)	5.00 (4.68)	6.25 (3.95)	7.50 (2.50)	5.00 (4.68)	5.00 (4.68)	7.50 (4.68)	5.00 (4.68)
omim_long	26.67 (24.94)	25.00 (12.91)	0.00 (0.00)	33.33 (29.81)	6.67 (13.33)	20.00 (16.33)	38.33 (25.60)	38.33 (25.60)	38.33 (25.60)	26.67 (24.94)	33.33 (36.51)
omim_lung	5.00 (10.00)	0.00 (0.00)	0.00 (0.00)	0.00 (0.00)	0.00 (0.00)	0.00 (0.00)	5.00 (10.00)	5.00 (10.00)	5.00 (10.00)	5.00 (10.00)	10.00 (12.25)
omim_lymphoma	0.00 (0.00)	0.00 (0.00)	0.00 (0.00)	0.00 (0.00)	0.00 (0.00)	0.00 (0.00)	0.00 (0.00)	0.00 (0.00)	0.00 (0.00)	0.00 (0.00)	0.00 (0.00)
omim_macular	33.33 (10.54)	40.00 (8.16)	3.33 (6.67)	26.67 (13.33)	6.67 (13.33)	10.00 (20.00)	33.33 (10.54)	33.33 (0.00)	33.33 (0.00)	30.00 (12.47)	40.00 (17.00)
omim_malaria	10.00 (12.25)	10.00 (12.25)	15.00 (20.00)	10.00 (12.25)	0.00 (0.00)	5.00 (10.00)	10.00 (12.25)	15.00 (20.00)	15.00 (20.00)	15.00 (20.00)	10.00 (12.25)
omim_melanoma	0.00 (0.00)	0.00 (0.00)	10.00 (20.00)	10.00 (20.00)	0.00 (0.00)	0.00 (0.00)	0.00 (0.00)	0.00 (0.00)	0.00 (0.00)	0.00 (0.00)	0.00 (0.00)
omim_mental	1.33 (2.67)	1.33 (2.67)	0.00 (0.00)	0.00 (0.00)	0.00 (0.00)	2.67 (3.27)	2.67 (3.27)	5.33 (6.53)	5.33 (6.53)	1.33 (2.67)	1.33 (2.67)
omim_microcephaly	0.00 (0.00)	0.00 (0.00)	0.00 (0.00)	0.00 (0.00)	0.00 (0.00)	0.00 (0.00)	0.00 (0.00)	0.00 (0.00)	0.00 (0.00)	0.00 (0.00)	0.00 (0.00)
omim_microphthalmia	40.00 (8.16)	13.33 (16.33)	0.00 (0.00)	13.33 (16.33)	6.67 (13.33)	13.33 (16.33)	13.33 (16.33)	13.33 (16.33)	13.33 (16.33)	13.33 (16.33)	40.00 (8.16)
omim_microvascular	0.00 (0.00)	0.00 (0.00)	16.67 (21.08)	16.67 (21.08)	0.00 (0.00)	0.00 (0.00)	0.00 (0.00)	16.67 (21.08)	16.67 (21.08)	10.00 (20.00)	0.00 (0.00)
omim_mitochondrial	18.00 (15.68)	22.00 (12.88)	9.00 (11.14)	5.00 (10.00)	0.00 (0.00)	9.00 (11.14)	22.00 (12.88)	27.00 (24.82)	31.00 (21.54)	9.00 (11.14)	27.00 (17.20)
omim_multiple	50.00 (20.00)	46.00 (14.97)	0.00 (0.00)	17.00 (8.72)	17.00 (8.72)	21.00 (12.81)	37.00 (14.00)	18.00 (18.33)	18.00 (18.33)	21.00 (12.81)	50.00 (20.00)
omim_muscular	43.00 (9.80)	47.00 (11.66)	4.00 (8.00)	14.00 (11.58)	33.00 (24.62)	43.00 (18.60)	48.00 (16.31)	47.00 (11.66)	47.00 (11.66)	47.00 (19.65)	43.00 (9.80)
omim_myasthenic	70.00 (24.49)	60.00 (20.00)	40.00 (37.42)	70.00 (24.49)	20.00 (24.49)	60.00 (20.00)	70.00 (24.49)	60.00 (20.00)	60.00 (20.00)	60.00 (20.00)	70.00 (24.49)
omim_myocardial	26.67 (24.94)	26.67 (24.94)	0.00 (0.00)	6.67 (13.33)	6.67 (13.33)	20.00 (16.33)	26.67 (24.94)	26.67 (24.94)	26.67 (24.94)	26.67 (24.94)	33.33 (21.08)
omim_myopathy	7.33 (9.04)	7.33 (9.04)	7.33 (9.04)	0.00 (0.00)	7.33 (9.04)	10.67 (13.73)	14.67 (12.93)	7.33 (9.04)	10.67 (13.73)	3.33 (6.67)	10.67 (13.73)
omim_neuropathy	11.33 (9.33)	11.33 (9.33)	11.33 (9.33)	4.00 (8.00)	4.00 (8.00)	15.33 (7.77)	7.33 (9.04)	11.33 (9.33)	11.33 (9.33)	11.33 (9.33)	11.33 (9.33)
omim_noonan	0.00 (0.00)	0.00 (0.00)	13.33 (26.67)	20.00 (16.33)	13.33 (26.67)	13.33 (26.67)	13.33 (26.67)	6.67 (13.33)	6.67 (13.33)	13.33 (26.67)	0.00 (0.00)
omim_obesity	29.33 (19.60)	29.33 (19.60)	8.00 (16.00)	30.00 (20.44)	18.00 (18.33)	32.67 (21.33)	40.00 (20.98)	33.33 (19.32)	33.33 (19.32)	29.33 (22.25)	40.00 (20.98)
omim_osteopetrosis	0.00 (0.00)	0.00 (0.00)	20.00 (24.49)	20.00 (24.49)	0.00 (0.00)	0.00 (0.00)	20.00 (24.49)	20.00 (24.49)	20.00 (24.49)	0.00 (0.00)	20.00 (24.49)
omim_ovarian	4.00 (8.00)	4.00 (8.00)	0.00 (0.00)	4.00 (8.00)	8.00 (9.80)	16.00 (14.97)	12.00 (9.80)	4.00 (8.00)	4.00 (8.00)	4.00 (8.00)	8.00 (9.80)
omim_pancreatic	0.00 (0.00)	0.00 (0.00)	23.33 (29.06)	11.67 (14.53)	23.33 (20.00)	23.33 (20.00)	16.67 (21.08)	0.00 (0.00)	0.00 (0.00)	23.33 (20.00)	0.00 (0.00)
omim_parkinson	10.00 (20.00)	10.00 (20.00)	0.00 (0.00)	0.00 (0.00)	0.00 (0.00)	0.00 (0.00)	0.00 (0.00)	0.00 (0.00)	0.00 (0.00)	0.00 (0.00)	10.00 (20.00)
omim_pituitary	26.67 (22.61)	26.67 (22.61)	0.00 (0.00)	23.33 (29.06)	6.67 (13.33)	23.33 (29.06)	40.00 (22.61)	26.67 (22.61)	33.33 (27.89)	23.33 (29.06)	26.67 (22.61)
omim_prostate	0.00 (0.00)	0.00 (0.00)	5.71 (7.00)	3.33 (6.67)	5.71 (7.00)	5.71 (7.00)	3.33 (6.67)	2.86 (5.71)	2.86 (5.71)	5.71 (7.00)	0.00 (0.00)
omim_pulmonary	18.33 (15.28)	6.67 (13.33)	0.00 (0.00)	6.67 (13.33)	0.00 (0.00)	20.00 (16.33)	25.00 (24.72)	0.00 (0.00)	6.67 (13.33)	6.67 (13.33)	25.00 (24.72)
omim_renal	4.00 (8.00)	0.00 (0.00)	4.00 (8.00)	0.00 (0.00)	4.00 (8.00)	8.00 (9.80)	16.00 (14.97)	4.00 (8.00)	4.00 (8.00)	4.00 (8.00)	4.00 (8.00)
omim_retinitis	28.33 (8.72)	15.51 (13.69)	0.00 (0.00)	1.54 (3.08)	3.08 (3.77)	9.36 (5.73)	15.64 (9.53)	9.36 (5.73)	9.36 (5.73)	9.36 (5.73)	25.13 (8.45)
omim_rheumatoid	33.00 (23.58)	33.00 (23.58)	0.00 (0.00)	0.00 (0.00)	0.00 (0.00)	5.00 (10.00)	13.00 (16.61)	28.00 (27.13)	28.00 (27.13)	24.00 (23.32)	33.00 (23.58)
omim_schizophrenia	0.00 (0.00)	0.00 (0.00)	0.00 (0.00)	20.00 (26.67)	0.00 (0.00)	6.67 (13.33)	6.67 (13.33)	0.00 (0.00)	0.00 (0.00)	0.00 (0.00)	0.00 (0.00)
omim_severe	40.00 (32.66)	40.00 (24.94)	26.67 (13.33)	60.00 (32.66)	0.00 (0.00)	26.67 (24.94)	53.33 (26.67)	26.67 (13.33)	40.00 (24.94)	26.67 (13.33)	53.33 (26.67)
omim_short	0.00 (0.00)	0.00 (0.00)	0.00 (0.00)	0.00 (0.00)	0.00 (0.00)	0.00 (0.00)	0.00 (0.00)	0.00 (0.00)	0.00 (0.00)	0.00 (0.00)	0.00 (0.00)
omim_spastic	4.00 (8.00)	0.00 (0.00)	0.00 (0.00)	0.00 (0.00)	4.00 (8.00)	0.00 (0.00)	10.00 (12.25)	0.00 (0.00)	0.00 (0.00)	0.00 (0.00)	4.00 (8.00)
omim_spinocerebellar	2.86 (5.71)	0.00 (0.00)	0.00 (0.00)	0.00 (0.00)	2.86 (5.71)	2.86 (5.71)	2.86 (5.71)	0.00 (0.00)	0.00 (0.00)	2.86 (5.71)	2.86 (5.71)
omim_systemic	10.00 (12.25)	5.00 (10.00)	0.00 (0.00)	5.00 (10.00)	0.00 (0.00)	0.00 (0.00)	0.00 (0.00)	10.00 (12.25)	10.00 (12.25)	5.00 (10.00)	10.00 (12.25)
omim_thrombophilia	50.00 (15.81)	50.00 (15.81)	0.00 (0.00)	10.00 (12.25)	5.00 (10.00)	20.00 (10.00)	45.00 (18.71)	60.00 (12.25)	55.00 (18.71)	50.00 (15.81)	55.00 (10.00)
omim_thyroid	3.33 (6.67)	3.33 (6.67)	3.33 (6.67)	0.00 (0.00)	0.00 (0.00)	3.33 (6.67)	6.67 (8.16)	3.33 (6.67)	3.33 (6.67)	0.00 (0.00)	3.33 (6.67)
omim_usher	70.00 (40.00)	70.00 (40.00)	50.00 (44.72)	70.00 (40.00)	40.00 (48.99)	70.00 (40.00)	70.00 (40.00)	70.00 (40.00)	70.00 (40.00)	70.00 (40.00)	70.00 (40.00)
omim_xeroderma	43.33 (32.66)	26.67 (22.61)	26.67 (22.61)	33.33 (27.89)	0.00 (0.00)	16.67 (21.08)	46.67 (24.49)	33.33 (18.26)	33.33 (18.26)	33.33 (18.26)	43.33 (32.66)
omim_zellweger	95.00 (10.00)	95.00 (10.00)	88.33 (14.53)	95.00 (10.00)	68.33 (21.34)	75.00 (12.91)	88.33 (14.53)	95.00 (10.00)	95.00 (10.00)	88.33 (14.53)	95.00 (10.00)

## Sheet: bPPI
	NetScore	NetZcore	NetShort	Func. Flow	PageRank	Random walk	Network propagation	NetCombo (NetScore + NetZcore + NetShort)	NetScore + NetZcore + NetShort + Network Propogation	All 7	NetScore + Network Propogation
chen_atherosclerosis	8.21 (6.74)	5.36 (6.59)	5.71 (7.00)	0.00 (0.00)	2.50 (5.00)	2.50 (5.00)	0.00 (0.00)	5.36 (6.59)	5.36 (6.59)	5.36 (6.59)	2.86 (5.71)
chen_autism	25.36 (15.54)	22.86 (14.35)	5.00 (6.12)	15.36 (9.29)	7.50 (6.12)	10.36 (5.22)	10.36 (5.22)	22.86 (14.35)	22.86 (14.35)	22.86 (14.35)	25.36 (15.54)
chen_cervical_carcinoma	43.09 (18.34)	25.27 (14.34)	6.00 (8.00)	21.45 (6.96)	10.00 (10.95)	10.00 (10.95)	23.45 (4.32)	29.09 (12.92)	27.09 (11.80)	27.09 (11.80)	35.27 (16.13)
chen_cirrhosis	15.24 (9.11)	12.38 (6.28)	11.90 (6.02)	9.05 (7.44)	0.00 (0.00)	2.86 (5.71)	9.05 (7.44)	11.90 (6.02)	11.90 (6.02)	14.76 (9.09)	15.24 (9.11)
chen_endometrial_carcinoma	25.00 (20.92)	20.36 (16.81)	18.21 (15.42)	18.57 (18.30)	10.71 (10.53)	23.57 (11.15)	23.21 (9.65)	17.50 (18.71)	17.50 (18.71)	22.86 (16.38)	22.50 (20.00)
chen_endometriosis	15.91 (10.16)	1.67 (3.33)	7.27 (8.91)	3.48 (4.27)	5.30 (4.34)	3.64 (4.45)	3.64 (4.45)	5.45 (4.45)	5.45 (4.45)	5.45 (4.45)	12.27 (11.82)
chen_epilepsy	33.61 (14.36)	33.61 (11.99)	9.72 (9.30)	16.94 (5.51)	2.50 (5.00)	2.50 (5.00)	14.44 (8.81)	38.33 (15.23)	38.33 (15.23)	35.83 (16.16)	33.61 (14.36)
chen_graves_disease	20.00 (10.95)	4.00 (4.90)	4.00 (4.90)	12.00 (7.48)	6.00 (8.00)	8.00 (7.48)	20.00 (8.94)	26.00 (20.59)	26.00 (20.59)	24.00 (18.55)	20.00 (10.95)
chen_hypercholesterolaemia	46.00 (19.60)	42.67 (20.04)	38.67 (12.93)	38.67 (12.93)	7.33 (9.04)	22.67 (13.73)	42.67 (20.04)	54.00 (14.97)	54.00 (19.60)	54.00 (19.60)	46.00 (19.60)
chen_inflammatory_bowel_disease	27.50 (11.93)	18.33 (9.23)	9.17 (4.61)	25.28 (13.62)	5.00 (10.00)	25.28 (9.31)	31.94 (8.70)	25.28 (18.27)	27.50 (17.04)	32.22 (17.36)	25.28 (13.62)
chen_ischaemic_stroke	27.05 (16.74)	18.97 (8.67)	20.13 (11.38)	18.85 (4.28)	4.74 (3.88)	6.28 (3.15)	9.36 (3.02)	23.72 (10.77)	23.72 (10.77)	23.72 (10.77)	23.85 (13.41)
chen_lymphoma	17.58 (5.32)	5.30 (4.34)	3.48 (4.27)	3.48 (4.27)	1.82 (3.64)	3.64 (4.45)	8.79 (0.37)	8.64 (10.79)	8.64 (10.79)	8.64 (10.79)	12.27 (7.15)
chen_migraine	2.86 (5.71)	0.00 (0.00)	6.19 (7.62)	0.00 (0.00)	6.19 (7.62)	6.19 (7.62)	0.00 (0.00)	0.00 (0.00)	0.00 (0.00)	0.00 (0.00)	2.86 (5.71)
chen_myocardial_ischemia	21.39 (9.84)	9.44 (4.76)	6.67 (5.44)	13.89 (4.21)	2.22 (4.44)	4.44 (5.44)	4.44 (5.44)	14.17 (8.89)	14.17 (8.89)	11.94 (10.60)	18.89 (10.19)
chen_neural_tube_defects	25.00 (7.75)	12.00 (9.80)	16.00 (8.00)	20.00 (12.65)	0.00 (0.00)	8.00 (9.80)	20.00 (12.65)	33.00 (8.72)	33.00 (8.72)	33.00 (8.72)	25.00 (7.75)
chen_osteoarthritis	28.89 (15.51)	14.89 (16.53)	6.00 (4.90)	14.44 (8.37)	8.00 (7.48)	20.44 (6.39)	33.11 (16.15)	20.89 (14.10)	24.89 (11.64)	27.11 (15.57)	26.89 (14.56)
chen_pancreatitis	24.29 (5.25)	13.21 (12.04)	0.00 (0.00)	2.50 (5.00)	0.00 (0.00)	2.50 (5.00)	7.50 (10.00)	15.71 (12.13)	15.71 (12.13)	15.71 (12.13)	18.57 (10.45)
chen_systemic_scleroderma	26.79 (13.46)	11.07 (10.62)	11.43 (10.69)	27.50 (9.69)	5.36 (6.59)	18.93 (6.55)	18.93 (11.16)	22.14 (11.16)	25.00 (13.92)	27.50 (9.69)	26.79 (13.46)
chen_ulcerative_colitis	29.33 (12.85)	23.11 (9.39)	0.00 (0.00)	14.67 (10.41)	6.44 (5.28)	14.89 (5.14)	21.11 (6.05)	23.11 (9.39)	23.11 (9.39)	23.11 (9.39)	24.89 (16.06)
goh_bone	18.33 (13.07)	11.67 (7.06)	4.72 (5.80)	9.44 (4.76)	4.44 (5.44)	9.17 (8.41)	11.67 (7.06)	11.67 (7.06)	11.67 (7.06)	11.67 (7.06)	18.33 (13.07)
goh_cancer	3.88 (4.35)	3.17 (2.80)	3.53 (1.94)	0.00 (0.00)	0.00 (0.00)	0.00 (0.00)	0.00 (0.00)	4.94 (4.05)	2.11 (2.58)	0.00 (0.00)	0.00 (0.00)
goh_cardiovascular	1.63 (2.00)	4.97 (1.68)	4.13 (3.73)	2.50 (2.04)	0.00 (0.00)	0.83 (1.67)	2.50 (2.04)	5.77 (1.96)	0.83 (1.67)	0.00 (0.00)	0.80 (1.60)
goh_connective_tissue	7.58 (8.43)	1.43 (2.86)	0.00 (0.00)	1.43 (2.86)	1.54 (3.08)	3.08 (3.77)	5.82 (5.38)	4.40 (3.59)	1.54 (3.08)	1.54 (3.08)	1.54 (3.08)
goh_dermatological	16.43 (11.71)	16.37 (8.69)	3.33 (4.44)	8.65 (4.34)	1.11 (2.22)	7.54 (4.28)	19.53 (4.24)	15.26 (9.60)	13.16 (10.38)	13.16 (10.38)	14.21 (10.32)
goh_developmental	12.20 (3.91)	9.23 (5.76)	5.93 (5.41)	10.66 (3.86)	3.08 (3.77)	3.08 (3.77)	9.23 (5.76)	12.20 (3.91)	12.20 (3.91)	12.20 (3.91)	10.66 (3.86)
goh_ear,nose,throat	13.57 (12.04)	11.07 (10.62)	2.86 (5.71)	13.93 (9.06)	5.36 (6.59)	8.21 (6.74)	11.07 (5.58)	11.07 (10.62)	11.07 (10.62)	11.07 (10.62)	13.57 (12.04)
goh_endocrine	11.01 (5.97)	11.88 (7.57)	3.44 (5.06)	3.44 (5.06)	1.70 (2.09)	2.57 (3.46)	3.37 (3.13)	10.14 (4.48)	5.14 (6.92)	2.57 (3.46)	2.57 (3.46)
goh_gastrointestinal	32.00 (20.40)	24.00 (14.97)	12.00 (16.00)	24.00 (8.00)	8.00 (9.80)	16.00 (8.00)	24.00 (14.97)	28.00 (20.40)	28.00 (20.40)	24.00 (23.32)	36.00 (14.97)
goh_hematological	17.95 (3.24)	21.03 (2.99)	6.15 (2.05)	0.00 (0.00)	0.00 (0.00)	0.00 (0.00)	0.00 (0.00)	21.54 (3.48)	17.44 (3.40)	0.00 (0.00)	6.15 (4.76)
goh_immunological	12.26 (6.58)	12.90 (2.89)	8.39 (3.29)	0.00 (0.00)	0.00 (0.00)	0.00 (0.00)	0.00 (0.00)	10.32 (4.74)	5.81 (2.41)	0.00 (0.00)	3.23 (2.04)
goh_metabolic	7.47 (1.65)	8.72 (2.44)	1.24 (1.66)	0.00 (0.00)	0.00 (0.00)	0.00 (0.00)	0.00 (0.00)	8.72 (2.44)	5.80 (2.00)	1.66 (1.56)	3.72 (1.52)
goh_multiple	9.09 (5.03)	9.49 (4.69)	3.18 (2.71)	0.00 (0.00)	0.00 (0.00)	0.00 (0.00)	0.00 (0.00)	9.90 (3.70)	7.51 (4.19)	0.80 (0.98)	3.56 (3.81)
goh_muscular	15.52 (10.53)	21.24 (8.01)	2.76 (3.39)	11.24 (3.36)	9.90 (9.72)	11.33 (5.79)	22.57 (5.45)	19.81 (8.47)	14.10 (7.83)	14.10 (7.83)	12.67 (8.31)
goh_neurological	1.37 (1.29)	2.74 (0.83)	2.38 (1.72)	0.00 (0.00)	0.00 (0.00)	0.00 (0.00)	0.00 (0.00)	1.72 (1.09)	0.68 (0.84)	0.00 (0.00)	0.00 (0.00)
goh_nutritional	30.00 (21.91)	30.00 (21.91)	34.00 (21.54)	30.00 (21.91)	14.00 (19.60)	22.00 (16.00)	30.00 (21.91)	30.00 (21.91)	30.00 (21.91)	30.00 (21.91)	30.00 (21.91)
goh_ophthamological	12.14 (4.84)	17.86 (4.52)	0.71 (1.43)	0.00 (0.00)	0.00 (0.00)	0.00 (0.00)	0.00 (0.00)	16.43 (4.29)	10.71 (5.98)	0.00 (0.00)	5.71 (2.86)
goh_psychiatric	0.00 (0.00)	0.00 (0.00)	3.33 (6.67)	0.00 (0.00)	6.67 (8.16)	6.67 (8.16)	0.00 (0.00)	0.00 (0.00)	0.00 (0.00)	0.00 (0.00)	0.00 (0.00)
goh_renal	15.14 (7.96)	16.67 (5.63)	6.86 (6.18)	9.52 (6.73)	2.86 (3.50)	5.62 (2.82)	11.14 (3.48)	13.81 (7.58)	12.48 (6.94)	13.90 (4.54)	12.38 (8.02)
goh_respiratory	5.00 (10.00)	13.21 (12.04)	7.86 (6.45)	12.86 (7.94)	5.36 (6.59)	13.21 (12.04)	15.36 (9.29)	7.50 (10.00)	7.50 (10.00)	7.50 (10.00)	7.50 (10.00)
goh_skeletal	13.85 (8.97)	7.69 (4.87)	6.15 (3.08)	4.62 (3.77)	3.08 (3.77)	6.15 (3.08)	3.08 (3.77)	6.15 (5.76)	4.62 (3.77)	4.62 (3.77)	12.31 (7.84)
omim_adrenoleukodystrophy	90.00 (20.00)	90.00 (20.00)	60.00 (48.99)	90.00 (20.00)	40.00 (37.42)	40.00 (37.42)	80.00 (24.49)	90.00 (20.00)	90.00 (20.00)	90.00 (20.00)	90.00 (20.00)
omim_aids	0.00 (0.00)	0.00 (0.00)	0.00 (0.00)	0.00 (0.00)	0.00 (0.00)	0.00 (0.00)	0.00 (0.00)	0.00 (0.00)	0.00 (0.00)	0.00 (0.00)	0.00 (0.00)
omim_alzheimer	0.00 (0.00)	6.67 (13.33)	33.33 (22.97)	20.00 (18.71)	5.00 (10.00)	5.00 (10.00)	15.00 (12.25)	28.33 (21.47)	28.33 (21.47)	15.00 (20.00)	0.00 (0.00)
omim_amyloidosis	10.00 (20.00)	20.00 (24.49)	20.00 (24.49)	50.00 (31.62)	0.00 (0.00)	0.00 (0.00)	20.00 (24.49)	20.00 (24.49)	20.00 (24.49)	20.00 (24.49)	10.00 (20.00)
omim_amyotrophic	20.00 (10.00)	10.00 (12.25)	0.00 (0.00)	10.00 (12.25)	0.00 (0.00)	10.00 (12.25)	10.00 (12.25)	10.00 (12.25)	10.00 (12.25)	10.00 (12.25)	20.00 (10.00)
omim_anemia	16.67 (21.08)	0.00 (0.00)	0.00 (0.00)	16.67 (21.08)	16.67 (21.08)	0.00 (0.00)	16.67 (21.08)	16.67 (21.08)	16.67 (21.08)	16.67 (21.08)	16.67 (21.08)
omim_arrhythmogenic	60.00 (20.00)	60.00 (20.00)	70.00 (24.49)	60.00 (37.42)	40.00 (37.42)	50.00 (31.62)	70.00 (24.49)	70.00 (24.49)	70.00 (24.49)	70.00 (24.49)	60.00 (20.00)
omim_asthma	0.00 (0.00)	5.00 (10.00)	18.33 (15.28)	11.67 (14.53)	0.00 (0.00)	6.67 (13.33)	18.33 (15.28)	18.33 (15.28)	18.33 (15.28)	6.67 (13.33)	11.67 (14.53)
omim_atrial	10.00 (12.25)	10.00 (12.25)	5.00 (10.00)	0.00 (0.00)	0.00 (0.00)	0.00 (0.00)	10.00 (12.25)	5.00 (10.00)	5.00 (10.00)	5.00 (10.00)	10.00 (12.25)
omim_autism	0.00 (0.00)	0.00 (0.00)	0.00 (0.00)	0.00 (0.00)	0.00 (0.00)	0.00 (0.00)	0.00 (0.00)	0.00 (0.00)	0.00 (0.00)	0.00 (0.00)	0.00 (0.00)
omim_autoimmune	6.67 (13.33)	6.67 (13.33)	6.67 (13.33)	30.00 (16.33)	16.67 (21.08)	16.67 (21.08)	30.00 (16.33)	13.33 (16.33)	13.33 (16.33)	23.33 (20.00)	6.67 (13.33)
omim_bardet_biedl	66.67 (29.81)	25.00 (12.91)	13.33 (16.33)	50.00 (14.91)	18.33 (15.28)	18.33 (15.28)	36.67 (22.11)	46.67 (33.99)	46.67 (33.99)	25.00 (12.91)	66.67 (29.81)
omim_blood	11.39 (12.18)	6.94 (9.04)	4.44 (5.44)	0.00 (0.00)	0.00 (0.00)	2.22 (4.44)	9.17 (8.41)	9.17 (8.41)	9.17 (8.41)	2.22 (4.44)	13.61 (10.84)
omim_brachydactyly	40.00 (37.42)	40.00 (37.42)	40.00 (37.42)	40.00 (37.42)	10.00 (20.00)	20.00 (24.49)	40.00 (37.42)	40.00 (37.42)	40.00 (37.42)	40.00 (37.42)	40.00 (37.42)
omim_breast	10.00 (13.33)	12.86 (12.38)	18.10 (17.41)	15.24 (15.69)	14.76 (15.68)	14.76 (15.68)	15.71 (9.11)	12.86 (12.38)	16.19 (10.58)	28.10 (10.90)	16.19 (10.58)
omim_cardiomyopathy	7.27 (6.80)	9.09 (5.75)	1.82 (3.64)	7.27 (3.64)	7.27 (6.80)	7.27 (6.80)	14.55 (9.27)	7.27 (6.80)	7.27 (6.80)	10.91 (6.80)	7.27 (6.80)
omim_cataract	33.33 (7.30)	37.33 (3.27)	3.33 (6.67)	28.67 (11.85)	32.67 (11.62)	36.67 (9.89)	48.67 (10.67)	29.33 (8.00)	33.33 (7.30)	36.67 (9.89)	37.33 (3.27)
omim_cerebral	33.33 (32.06)	38.33 (39.30)	0.00 (0.00)	35.00 (37.42)	38.33 (18.71)	38.33 (18.71)	33.33 (32.06)	33.33 (32.06)	38.33 (39.30)	38.33 (39.30)	38.33 (39.30)
omim_charcot_marie_tooth	10.36 (9.48)	7.50 (10.00)	0.00 (0.00)	0.00 (0.00)	2.86 (5.71)	13.57 (0.87)	21.43 (10.83)	7.50 (10.00)	7.50 (10.00)	7.50 (10.00)	15.71 (12.90)
omim_colon	0.00 (0.00)	0.00 (0.00)	0.00 (0.00)	10.00 (20.00)	10.00 (20.00)	10.00 (20.00)	10.00 (20.00)	0.00 (0.00)	0.00 (0.00)	10.00 (20.00)	0.00 (0.00)
omim_colorectal	15.71 (10.19)	17.86 (12.63)	18.57 (6.83)	23.93 (10.81)	18.57 (10.45)	26.43 (9.20)	28.57 (11.74)	18.21 (10.62)	20.36 (12.56)	28.93 (4.57)	17.86 (9.85)
omim_combined	17.00 (15.36)	17.00 (15.36)	4.00 (8.00)	16.00 (19.60)	0.00 (0.00)	12.00 (16.00)	16.00 (19.60)	17.00 (15.36)	17.00 (15.36)	16.00 (19.60)	21.00 (18.00)
omim_cone_rod	33.00 (23.58)	25.00 (14.83)	4.00 (8.00)	26.00 (24.98)	25.00 (7.75)	20.00 (12.65)	42.00 (13.27)	25.00 (23.24)	25.00 (23.24)	37.00 (14.00)	41.00 (16.85)
omim_congenital	35.33 (20.18)	32.00 (24.00)	12.00 (16.00)	32.00 (24.00)	24.00 (19.60)	28.00 (20.40)	32.00 (24.00)	28.00 (27.13)	32.00 (24.00)	32.00 (24.00)	32.00 (24.00)
omim_coronary	5.00 (10.00)	5.00 (10.00)	0.00 (0.00)	6.67 (13.33)	0.00 (0.00)	5.00 (10.00)	11.67 (14.53)	0.00 (0.00)	0.00 (0.00)	0.00 (0.00)	5.00 (10.00)
omim_deafness	11.64 (4.20)	9.64 (6.34)	2.00 (4.00)	5.64 (4.61)	0.00 (0.00)	5.64 (4.61)	5.64 (4.61)	5.64 (4.61)	5.64 (4.61)	5.64 (4.61)	7.64 (3.84)
omim_dementia	20.00 (24.49)	10.00 (20.00)	46.67 (32.32)	46.67 (32.32)	10.00 (20.00)	20.00 (24.49)	76.67 (29.06)	36.67 (37.12)	46.67 (45.22)	46.67 (45.22)	20.00 (24.49)
omim_diabetes	5.15 (6.75)	5.15 (6.75)	9.09 (5.75)	7.27 (3.64)	1.82 (3.64)	3.64 (4.45)	16.21 (10.71)	5.15 (6.75)	6.82 (9.75)	5.30 (4.34)	8.79 (7.81)
omim_diamond_blackfan	80.00 (24.49)	60.00 (37.42)	60.00 (37.42)	60.00 (37.42)	10.00 (20.00)	0.00 (0.00)	60.00 (37.42)	70.00 (40.00)	70.00 (40.00)	60.00 (37.42)	80.00 (24.49)
omim_dystonia	0.00 (0.00)	6.67 (13.33)	13.33 (16.33)	20.00 (26.67)	6.67 (13.33)	6.67 (13.33)	6.67 (13.33)	13.33 (16.33)	13.33 (16.33)	13.33 (16.33)	0.00 (0.00)
omim_ectodermal	23.33 (20.00)	23.33 (20.00)	20.00 (26.67)	23.33 (20.00)	0.00 (0.00)	16.67 (21.08)	23.33 (20.00)	36.67 (22.11)	36.67 (22.11)	36.67 (22.11)	23.33 (20.00)
omim_epidermolysis	58.33 (14.91)	58.33 (14.91)	66.67 (24.15)	76.67 (12.25)	16.67 (13.94)	51.67 (17.00)	76.67 (12.25)	76.67 (12.25)	76.67 (12.25)	76.67 (12.25)	70.00 (4.08)
omim_epilepsy	25.00 (7.75)	25.00 (7.75)	21.00 (2.00)	21.00 (2.00)	8.00 (9.80)	21.00 (12.81)	25.00 (7.75)	25.00 (7.75)	25.00 (7.75)	25.00 (7.75)	25.00 (7.75)
omim_epileptic	0.00 (0.00)	0.00 (0.00)	0.00 (0.00)	0.00 (0.00)	0.00 (0.00)	0.00 (0.00)	0.00 (0.00)	0.00 (0.00)	0.00 (0.00)	0.00 (0.00)	0.00 (0.00)
omim_epiphyseal	70.00 (40.00)	70.00 (40.00)	60.00 (37.42)	60.00 (37.42)	10.00 (20.00)	10.00 (20.00)	60.00 (37.42)	70.00 (40.00)	70.00 (40.00)	70.00 (40.00)	70.00 (40.00)
omim_esophageal	0.00 (0.00)	0.00 (0.00)	0.00 (0.00)	0.00 (0.00)	0.00 (0.00)	0.00 (0.00)	0.00 (0.00)	0.00 (0.00)	0.00 (0.00)	0.00 (0.00)	0.00 (0.00)
omim_factor	80.00 (16.33)	80.00 (16.33)	66.67 (29.81)	80.00 (16.33)	26.67 (24.94)	66.67 (29.81)	66.67 (29.81)	80.00 (16.33)	80.00 (16.33)	73.33 (24.94)	80.00 (16.33)
omim_fanconi	63.00 (12.49)	63.00 (12.49)	59.00 (15.62)	64.00 (15.94)	47.00 (29.77)	55.00 (26.65)	64.00 (15.94)	64.00 (15.94)	64.00 (15.94)	64.00 (15.94)	64.00 (15.94)
omim_gastric	4.00 (8.00)	4.00 (8.00)	0.00 (0.00)	8.00 (9.80)	0.00 (0.00)	0.00 (0.00)	0.00 (0.00)	0.00 (0.00)	0.00 (0.00)	0.00 (0.00)	4.00 (8.00)
omim_glomerulosclerosis	0.00 (0.00)	0.00 (0.00)	0.00 (0.00)	0.00 (0.00)	0.00 (0.00)	0.00 (0.00)	0.00 (0.00)	0.00 (0.00)	0.00 (0.00)	0.00 (0.00)	0.00 (0.00)
omim_glycogen	33.33 (21.08)	33.33 (21.08)	13.33 (16.33)	33.33 (21.08)	13.33 (16.33)	20.00 (16.33)	20.00 (16.33)	26.67 (24.94)	26.67 (24.94)	26.67 (24.94)	33.33 (21.08)
omim_hemolytic	36.00 (14.97)	36.00 (14.97)	32.00 (16.00)	28.00 (20.40)	8.00 (9.80)	8.00 (9.80)	32.00 (16.00)	36.00 (14.97)	36.00 (14.97)	32.00 (16.00)	36.00 (14.97)
omim_hemophagocytic	20.00 (24.49)	20.00 (24.49)	30.00 (24.49)	30.00 (24.49)	0.00 (0.00)	0.00 (0.00)	30.00 (24.49)	30.00 (24.49)	30.00 (24.49)	30.00 (24.49)	30.00 (24.49)
omim_hepatocellular	0.00 (0.00)	0.00 (0.00)	10.00 (20.00)	20.00 (40.00)	30.00 (40.00)	30.00 (40.00)	20.00 (40.00)	0.00 (0.00)	0.00 (0.00)	30.00 (40.00)	0.00 (0.00)
omim_high	30.00 (24.49)	10.00 (20.00)	20.00 (24.49)	40.00 (37.42)	0.00 (0.00)	10.00 (20.00)	20.00 (24.49)	20.00 (24.49)	20.00 (24.49)	20.00 (24.49)	30.00 (24.49)
omim_hypercholesterolemia	0.00 (0.00)	0.00 (0.00)	16.67 (21.08)	16.67 (21.08)	0.00 (0.00)	6.67 (13.33)	23.33 (20.00)	6.67 (13.33)	6.67 (13.33)	6.67 (13.33)	6.67 (13.33)
omim_hypertension	23.33 (20.00)	30.00 (26.67)	23.33 (20.00)	36.67 (22.11)	0.00 (0.00)	10.00 (20.00)	23.33 (20.00)	23.33 (20.00)	23.33 (20.00)	23.33 (20.00)	23.33 (20.00)
omim_ichthyosis	10.00 (20.00)	20.00 (40.00)	13.33 (16.33)	13.33 (16.33)	0.00 (0.00)	0.00 (0.00)	13.33 (16.33)	23.33 (20.00)	23.33 (20.00)	0.00 (0.00)	10.00 (20.00)
omim_immunodeficiency	11.33 (9.33)	11.33 (9.33)	10.00 (13.33)	14.00 (12.72)	4.00 (8.00)	7.33 (9.04)	14.00 (12.72)	18.00 (10.67)	18.00 (10.67)	14.67 (12.93)	21.33 (16.14)
omim_keratosis	40.00 (37.42)	40.00 (37.42)	10.00 (20.00)	30.00 (24.49)	0.00 (0.00)	0.00 (0.00)	30.00 (24.49)	40.00 (37.42)	40.00 (37.42)	20.00 (24.49)	40.00 (37.42)
omim_leigh	43.33 (32.66)	43.33 (32.66)	23.33 (20.00)	30.00 (26.67)	6.67 (13.33)	36.67 (22.11)	43.33 (32.66)	43.33 (32.66)	43.33 (32.66)	43.33 (32.66)	43.33 (32.66)
omim_leukemia	7.67 (6.27)	3.83 (3.13)	7.83 (2.76)	6.33 (5.59)	5.08 (4.70)	6.33 (6.85)	5.08 (4.70)	5.08 (4.70)	5.08 (4.70)	8.92 (7.59)	7.67 (6.27)
omim_long	33.33 (29.81)	31.67 (21.34)	31.67 (36.67)	45.00 (34.80)	6.67 (13.33)	20.00 (16.33)	45.00 (34.80)	45.00 (34.80)	45.00 (34.80)	33.33 (29.81)	40.00 (38.87)
omim_lung	6.67 (13.33)	0.00 (0.00)	0.00 (0.00)	11.67 (14.53)	0.00 (0.00)	0.00 (0.00)	0.00 (0.00)	6.67 (13.33)	6.67 (13.33)	6.67 (13.33)	6.67 (13.33)
omim_lymphoma	0.00 (0.00)	0.00 (0.00)	0.00 (0.00)	0.00 (0.00)	0.00 (0.00)	0.00 (0.00)	0.00 (0.00)	0.00 (0.00)	0.00 (0.00)	0.00 (0.00)	0.00 (0.00)
omim_macular	38.00 (16.28)	41.33 (12.93)	21.33 (14.08)	34.67 (10.87)	6.67 (13.33)	16.67 (18.26)	37.33 (11.43)	31.33 (7.77)	34.67 (10.87)	38.00 (6.53)	44.67 (12.58)
omim_malaria	10.00 (12.25)	10.00 (12.25)	5.00 (10.00)	10.00 (12.25)	0.00 (0.00)	0.00 (0.00)	10.00 (12.25)	10.00 (12.25)	10.00 (12.25)	10.00 (12.25)	10.00 (12.25)
omim_melanoma	0.00 (0.00)	0.00 (0.00)	20.00 (24.49)	20.00 (24.49)	0.00 (0.00)	0.00 (0.00)	0.00 (0.00)	20.00 (24.49)	20.00 (24.49)	10.00 (20.00)	0.00 (0.00)
omim_mental	0.00 (0.00)	0.00 (0.00)	9.90 (3.58)	4.19 (3.43)	0.00 (0.00)	1.33 (2.67)	1.33 (2.67)	4.19 (5.67)	4.19 (5.67)	1.33 (2.67)	1.33 (2.67)
omim_microcephaly	10.00 (20.00)	0.00 (0.00)	0.00 (0.00)	0.00 (0.00)	0.00 (0.00)	0.00 (0.00)	0.00 (0.00)	0.00 (0.00)	0.00 (0.00)	0.00 (0.00)	0.00 (0.00)
omim_microphthalmia	26.67 (24.94)	13.33 (16.33)	0.00 (0.00)	13.33 (16.33)	13.33 (16.33)	13.33 (16.33)	13.33 (16.33)	13.33 (16.33)	13.33 (16.33)	13.33 (16.33)	20.00 (16.33)
omim_microvascular	0.00 (0.00)	0.00 (0.00)	0.00 (0.00)	0.00 (0.00)	0.00 (0.00)	0.00 (0.00)	0.00 (0.00)	0.00 (0.00)	0.00 (0.00)	0.00 (0.00)	0.00 (0.00)
omim_mitochondrial	30.00 (18.71)	30.00 (18.71)	10.00 (12.25)	30.00 (18.71)	5.00 (10.00)	20.00 (10.00)	30.00 (18.71)	30.00 (18.71)	30.00 (18.71)	30.00 (18.71)	30.00 (18.71)
omim_multiple	35.00 (10.95)	26.00 (7.35)	0.00 (0.00)	22.00 (2.45)	18.00 (9.27)	22.00 (12.88)	32.00 (19.39)	14.00 (11.58)	14.00 (11.58)	18.00 (9.27)	40.00 (10.95)
omim_muscular	61.67 (23.33)	56.67 (27.59)	26.67 (3.33)	46.67 (17.16)	6.67 (13.33)	26.67 (16.16)	41.67 (19.00)	41.67 (19.00)	41.67 (19.00)	36.67 (11.30)	61.67 (23.33)
omim_myasthenic	70.00 (24.49)	60.00 (20.00)	50.00 (31.62)	70.00 (24.49)	20.00 (24.49)	60.00 (20.00)	70.00 (24.49)	70.00 (24.49)	70.00 (24.49)	60.00 (20.00)	70.00 (24.49)
omim_myocardial	30.00 (16.33)	40.00 (32.66)	6.67 (13.33)	10.00 (20.00)	13.33 (16.33)	20.00 (26.67)	30.00 (26.67)	23.33 (20.00)	23.33 (20.00)	30.00 (16.33)	36.67 (6.67)
omim_myopathy	12.00 (16.00)	4.00 (8.00)	20.00 (21.91)	12.00 (9.80)	4.00 (8.00)	8.00 (9.80)	16.00 (14.97)	16.00 (14.97)	16.00 (14.97)	8.00 (9.80)	8.00 (9.80)
omim_neuropathy	5.00 (10.00)	0.00 (0.00)	0.00 (0.00)	0.00 (0.00)	5.00 (10.00)	5.00 (10.00)	9.00 (11.14)	0.00 (0.00)	0.00 (0.00)	0.00 (0.00)	5.00 (10.00)
omim_noonan	0.00 (0.00)	0.00 (0.00)	6.67 (13.33)	20.00 (26.67)	20.00 (26.67)	13.33 (26.67)	6.67 (13.33)	0.00 (0.00)	0.00 (0.00)	13.33 (26.67)	0.00 (0.00)
omim_obesity	28.00 (20.40)	28.00 (20.40)	36.00 (14.97)	36.00 (14.97)	16.00 (8.00)	24.00 (14.97)	40.00 (12.65)	32.00 (16.00)	32.00 (16.00)	28.00 (20.40)	32.00 (16.00)
omim_osteopetrosis	0.00 (0.00)	0.00 (0.00)	20.00 (24.49)	20.00 (24.49)	0.00 (0.00)	0.00 (0.00)	20.00 (24.49)	20.00 (24.49)	20.00 (24.49)	0.00 (0.00)	20.00 (24.49)
omim_ovarian	8.00 (9.80)	16.00 (8.00)	0.00 (0.00)	16.00 (14.97)	16.00 (14.97)	16.00 (23.32)	12.00 (9.80)	8.00 (9.80)	8.00 (9.80)	20.00 (21.91)	8.00 (9.80)
omim_pancreatic	0.00 (0.00)	0.00 (0.00)	21.67 (19.44)	28.33 (16.33)	23.33 (20.00)	23.33 (20.00)	16.67 (21.08)	0.00 (0.00)	0.00 (0.00)	23.33 (20.00)	0.00 (0.00)
omim_parkinson	6.67 (13.33)	0.00 (0.00)	6.67 (13.33)	0.00 (0.00)	6.67 (13.33)	0.00 (0.00)	0.00 (0.00)	0.00 (0.00)	0.00 (0.00)	0.00 (0.00)	6.67 (13.33)
omim_pituitary	30.00 (24.49)	30.00 (24.49)	0.00 (0.00)	30.00 (24.49)	46.67 (32.32)	36.67 (37.12)	46.67 (32.32)	30.00 (24.49)	30.00 (24.49)	36.67 (19.44)	30.00 (24.49)
omim_prostate	0.00 (0.00)	9.05 (7.44)	9.52 (7.82)	12.38 (6.28)	6.19 (7.62)	6.19 (7.62)	6.67 (8.16)	9.05 (7.44)	9.05 (7.44)	6.19 (7.62)	2.86 (5.71)
omim_pulmonary	18.33 (15.28)	6.67 (13.33)	0.00 (0.00)	6.67 (13.33)	6.67 (13.33)	20.00 (26.67)	18.33 (15.28)	6.67 (13.33)	6.67 (13.33)	13.33 (26.67)	18.33 (15.28)
omim_renal	14.00 (19.60)	4.00 (8.00)	4.00 (8.00)	17.00 (15.36)	4.00 (8.00)	8.00 (9.80)	20.00 (21.91)	8.00 (16.00)	8.00 (16.00)	0.00 (0.00)	9.00 (11.14)
omim_retinitis	23.33 (3.33)	16.67 (7.45)	3.33 (4.08)	15.00 (8.16)	5.00 (6.67)	15.00 (6.24)	21.67 (10.00)	13.33 (6.67)	13.33 (6.67)	15.00 (6.24)	25.00 (5.27)
omim_rheumatoid	39.00 (13.56)	39.00 (13.56)	5.00 (10.00)	19.00 (18.55)	0.00 (0.00)	4.00 (8.00)	24.00 (15.94)	30.00 (18.71)	30.00 (18.71)	34.00 (13.19)	39.00 (13.56)
omim_schizophrenia	0.00 (0.00)	0.00 (0.00)	0.00 (0.00)	0.00 (0.00)	16.67 (21.08)	16.67 (21.08)	10.00 (20.00)	0.00 (0.00)	0.00 (0.00)	0.00 (0.00)	0.00 (0.00)
omim_severe	33.33 (29.81)	40.00 (32.66)	33.33 (29.81)	40.00 (38.87)	6.67 (13.33)	20.00 (16.33)	40.00 (24.94)	33.33 (29.81)	33.33 (29.81)	40.00 (24.94)	40.00 (24.94)
omim_short	0.00 (0.00)	0.00 (0.00)	0.00 (0.00)	0.00 (0.00)	0.00 (0.00)	0.00 (0.00)	0.00 (0.00)	0.00 (0.00)	0.00 (0.00)	0.00 (0.00)	0.00 (0.00)
omim_spastic	0.00 (0.00)	0.00 (0.00)	0.00 (0.00)	5.00 (10.00)	0.00 (0.00)	5.00 (10.00)	10.00 (12.25)	0.00 (0.00)	0.00 (0.00)	0.00 (0.00)	5.00 (10.00)
omim_spinocerebellar	0.00 (0.00)	0.00 (0.00)	3.33 (6.67)	0.00 (0.00)	5.71 (11.43)	2.86 (5.71)	0.00 (0.00)	0.00 (0.00)	0.00 (0.00)	2.86 (5.71)	0.00 (0.00)
omim_systemic	10.00 (12.25)	5.00 (10.00)	0.00 (0.00)	18.00 (15.68)	0.00 (0.00)	0.00 (0.00)	0.00 (0.00)	5.00 (10.00)	5.00 (10.00)	5.00 (10.00)	10.00 (12.25)
omim_thrombophilia	70.00 (10.00)	50.00 (15.81)	40.00 (20.00)	45.00 (10.00)	15.00 (12.25)	20.00 (10.00)	40.00 (12.25)	50.00 (15.81)	50.00 (15.81)	50.00 (15.81)	65.00 (12.25)
omim_thyroid	3.33 (6.67)	3.33 (6.67)	3.33 (6.67)	3.33 (6.67)	0.00 (0.00)	4.00 (8.00)	7.33 (9.04)	3.33 (6.67)	3.33 (6.67)	3.33 (6.67)	3.33 (6.67)
omim_usher	70.00 (40.00)	70.00 (40.00)	50.00 (44.72)	70.00 (40.00)	40.00 (48.99)	70.00 (40.00)	70.00 (40.00)	70.00 (40.00)	70.00 (40.00)	70.00 (40.00)	70.00 (40.00)
omim_xeroderma	90.00 (20.00)	80.00 (24.49)	56.67 (22.61)	80.00 (24.49)	0.00 (0.00)	50.00 (31.62)	63.33 (19.44)	80.00 (24.49)	80.00 (24.49)	73.33 (22.61)	90.00 (20.00)
omim_zellweger	95.00 (10.00)	95.00 (10.00)	76.67 (20.00)	95.00 (10.00)	65.00 (31.80)	83.33 (21.08)	88.33 (14.53)	95.00 (10.00)	95.00 (10.00)	88.33 (14.53)	95.00 (10.00)

## Sheet: weighted bPPI
	NetScore	NetZcore	NetShort	Func. Flow	PageRank	Random walk	Network propagation	NetCombo (NetScore + NetZcore + NetShort)	NetScore + NetZcore + NetShort + Network Propogation	All 7	NetScore + Network Propogation
chen_atherosclerosis	8.21 (6.74)	7.86 (10.20)	5.71 (7.00)	2.50 (5.00)	2.50 (5.00)	2.50 (5.00)	0.00 (0.00)	11.07 (10.62)	8.21 (6.74)	8.21 (6.74)	8.21 (6.74)
chen_autism	25.36 (15.54)	15.36 (12.20)	5.00 (6.12)	17.86 (9.85)	10.36 (5.22)	10.36 (5.22)	10.36 (5.22)	22.86 (14.35)	22.86 (14.35)	20.36 (12.56)	25.36 (15.54)
chen_cervical_carcinoma	40.91 (16.17)	29.45 (16.77)	4.00 (4.90)	23.45 (7.66)	11.82 (9.84)	12.00 (9.80)	23.45 (4.32)	39.09 (16.28)	39.09 (16.28)	27.45 (17.18)	35.27 (13.43)
chen_cirrhosis	18.10 (10.50)	2.86 (5.71)	11.90 (6.02)	17.62 (10.61)	2.86 (5.71)	5.71 (7.00)	11.90 (6.02)	14.76 (9.09)	18.10 (11.82)	18.10 (11.82)	20.95 (6.28)
chen_endometrial_carcinoma	22.50 (14.58)	20.36 (12.56)	18.21 (15.42)	31.07 (17.55)	23.57 (11.15)	23.57 (11.15)	23.21 (5.53)	20.36 (12.56)	20.36 (12.56)	33.57 (13.33)	17.50 (15.00)
chen_endometriosis	14.09 (14.40)	1.67 (3.33)	9.09 (11.50)	3.48 (4.27)	5.45 (7.27)	3.64 (4.45)	3.64 (4.45)	3.48 (4.27)	5.30 (4.34)	3.64 (4.45)	8.79 (7.81)
chen_epilepsy	36.11 (11.21)	24.17 (6.67)	9.72 (9.30)	26.39 (10.24)	2.50 (5.00)	7.22 (5.92)	16.94 (9.64)	31.39 (8.13)	31.39 (8.13)	28.89 (11.09)	33.61 (14.36)
chen_graves_disease	16.00 (10.20)	6.00 (4.90)	4.00 (4.90)	10.00 (8.94)	6.00 (4.90)	12.00 (4.00)	20.00 (10.95)	16.00 (13.56)	16.00 (13.56)	18.00 (13.27)	12.00 (9.80)
chen_hypercholesterolaemia	46.00 (26.53)	38.67 (12.93)	38.67 (12.93)	50.67 (17.18)	22.67 (13.73)	22.67 (13.73)	46.67 (21.08)	50.00 (20.00)	54.00 (19.60)	54.00 (19.60)	54.00 (14.97)
chen_inflammatory_bowel_disease	16.39 (12.68)	8.89 (4.44)	11.39 (7.05)	23.06 (16.38)	14.17 (14.28)	18.61 (12.53)	31.94 (8.70)	18.33 (11.60)	15.83 (11.24)	18.61 (10.38)	16.39 (12.68)
chen_ischaemic_stroke	12.69 (6.84)	4.62 (6.15)	21.79 (8.81)	20.26 (5.98)	7.82 (4.87)	6.28 (3.15)	12.56 (4.01)	14.23 (6.39)	17.31 (6.20)	17.31 (3.85)	11.03 (4.10)
chen_lymphoma	19.09 (7.88)	10.45 (8.08)	5.30 (4.34)	1.82 (3.64)	3.64 (4.45)	3.64 (4.45)	8.79 (0.37)	10.45 (9.92)	10.45 (9.92)	8.94 (8.14)	13.94 (11.27)
chen_migraine	0.00 (0.00)	0.00 (0.00)	6.19 (7.62)	0.00 (0.00)	6.19 (7.62)	6.19 (7.62)	0.00 (0.00)	0.00 (0.00)	0.00 (0.00)	6.19 (7.62)	0.00 (0.00)
chen_myocardial_ischemia	9.44 (9.23)	4.72 (5.80)	6.67 (5.44)	11.67 (0.68)	2.22 (4.44)	4.44 (5.44)	6.67 (8.89)	7.22 (9.88)	7.22 (9.88)	7.22 (9.88)	6.94 (5.69)
chen_neural_tube_defects	25.00 (14.83)	16.00 (8.00)	16.00 (8.00)	16.00 (14.97)	8.00 (9.80)	8.00 (9.80)	20.00 (12.65)	33.00 (8.72)	33.00 (8.72)	33.00 (8.72)	29.00 (9.17)
chen_osteoarthritis	22.67 (8.27)	14.67 (11.27)	6.00 (4.90)	18.89 (14.77)	20.44 (6.39)	22.44 (9.75)	33.11 (16.15)	18.89 (14.77)	20.89 (12.60)	20.89 (12.60)	24.67 (5.81)
chen_pancreatitis	24.29 (5.25)	10.71 (9.58)	5.36 (6.59)	7.86 (6.45)	7.86 (10.20)	2.50 (5.00)	7.50 (10.00)	21.07 (12.90)	23.57 (14.52)	15.71 (9.20)	21.43 (5.98)
chen_systemic_scleroderma	26.79 (7.49)	18.21 (12.49)	13.57 (0.87)	24.64 (6.23)	21.07 (9.20)	18.93 (6.55)	18.93 (11.16)	32.86 (8.27)	30.00 (6.62)	37.86 (5.22)	26.79 (7.49)
chen_ulcerative_colitis	22.89 (14.93)	16.89 (7.93)	0.00 (0.00)	16.89 (10.60)	8.67 (4.35)	12.89 (7.88)	19.11 (4.12)	25.11 (11.88)	27.11 (12.93)	25.11 (9.57)	24.89 (17.53)
goh_bone	11.67 (7.06)	9.44 (8.49)	4.72 (5.80)	7.22 (5.92)	9.17 (8.41)	9.17 (8.41)	11.67 (7.06)	7.22 (5.92)	7.22 (5.92)	11.67 (7.06)	11.67 (7.06)
goh_cancer	2.47 (2.63)	0.00 (0.00)	5.66 (3.07)	0.00 (0.00)	4.59 (3.10)	0.00 (0.00)	0.00 (0.00)	0.70 (0.86)	0.35 (0.70)	0.00 (0.00)	0.70 (0.86)
goh_cardiovascular	4.13 (2.64)	0.00 (0.00)	3.30 (3.11)	2.50 (2.04)	0.83 (1.67)	0.83 (1.67)	3.33 (3.12)	0.00 (0.00)	0.00 (0.00)	0.83 (1.67)	0.00 (0.00)
goh_connective_tissue	1.54 (3.08)	0.00 (0.00)	0.00 (0.00)	2.97 (3.64)	3.08 (3.77)	3.08 (3.77)	5.82 (5.38)	0.00 (0.00)	0.00 (0.00)	2.97 (3.64)	1.54 (3.08)
goh_dermatological	13.10 (4.57)	8.71 (4.44)	5.56 (7.03)	11.99 (5.38)	7.60 (5.62)	7.54 (4.28)	19.53 (2.38)	9.82 (4.20)	8.77 (4.53)	9.77 (2.12)	6.67 (6.48)
goh_developmental	10.66 (3.86)	9.23 (5.76)	5.93 (5.41)	6.04 (3.03)	3.08 (3.77)	3.08 (3.77)	9.23 (5.76)	10.66 (3.86)	10.66 (3.86)	10.66 (3.86)	9.23 (5.76)
goh_ear,nose,throat	16.43 (10.00)	8.21 (6.74)	5.71 (11.43)	13.93 (9.06)	8.21 (6.74)	11.07 (5.58)	13.93 (9.06)	8.57 (11.43)	8.57 (11.43)	11.07 (5.58)	16.43 (10.00)
goh_endocrine	9.35 (7.47)	3.44 (5.06)	4.24 (3.81)	4.31 (6.74)	1.70 (2.09)	2.57 (3.46)	3.37 (3.13)	4.28 (5.44)	3.44 (5.06)	2.57 (3.46)	2.57 (3.46)
goh_gastrointestinal	28.00 (20.40)	32.00 (20.40)	12.00 (16.00)	36.00 (19.60)	20.00 (12.65)	16.00 (8.00)	24.00 (14.97)	28.00 (20.40)	24.00 (23.32)	32.00 (24.00)	32.00 (16.00)
goh_hematological	15.38 (1.62)	0.00 (0.00)	10.26 (3.63)	0.00 (0.00)	3.59 (2.05)	0.00 (0.00)	0.00 (0.00)	9.23 (2.61)	2.56 (2.29)	0.00 (0.00)	4.10 (3.48)
goh_immunological	7.10 (3.16)	0.00 (0.00)	8.39 (3.29)	0.00 (0.00)	1.94 (1.58)	0.00 (0.00)	0.00 (0.00)	0.65 (1.29)	0.00 (0.00)	0.00 (0.00)	0.00 (0.00)
goh_metabolic	7.06 (1.04)	0.00 (0.00)	2.06 (2.60)	0.00 (0.00)	2.08 (3.23)	0.00 (0.00)	0.00 (0.00)	4.14 (1.28)	1.23 (1.64)	0.00 (0.00)	2.89 (1.62)
goh_multiple	6.34 (3.13)	0.00 (0.00)	1.98 (1.77)	0.00 (0.00)	2.38 (2.94)	0.00 (0.00)	0.00 (0.00)	3.18 (2.37)	0.80 (0.98)	0.00 (0.00)	2.78 (2.69)
goh_muscular	12.67 (5.31)	14.10 (4.53)	1.43 (2.86)	14.10 (4.53)	12.76 (7.08)	11.33 (5.79)	22.57 (5.45)	11.33 (5.79)	12.76 (5.45)	18.48 (8.70)	9.90 (5.76)
goh_neurological	1.72 (1.54)	0.00 (0.00)	2.74 (1.76)	0.00 (0.00)	0.68 (0.84)	0.00 (0.00)	0.00 (0.00)	0.34 (0.69)	0.00 (0.00)	0.00 (0.00)	0.34 (0.69)
goh_nutritional	30.00 (21.91)	30.00 (21.91)	34.00 (17.44)	34.00 (21.54)	26.00 (17.44)	22.00 (16.00)	30.00 (21.91)	30.00 (21.91)	30.00 (21.91)	30.00 (21.91)	30.00 (21.91)
goh_ophthamological	10.00 (5.71)	0.00 (0.00)	0.71 (1.43)	0.00 (0.00)	2.14 (1.75)	0.00 (0.00)	0.00 (0.00)	3.57 (5.53)	0.00 (0.00)	0.00 (0.00)	2.14 (2.86)
goh_psychiatric	0.00 (0.00)	0.00 (0.00)	3.33 (6.67)	0.00 (0.00)	6.67 (8.16)	6.67 (8.16)	0.00 (0.00)	0.00 (0.00)	0.00 (0.00)	3.33 (6.67)	0.00 (0.00)
goh_renal	13.81 (6.09)	6.95 (4.52)	6.86 (6.18)	11.14 (3.48)	4.19 (3.43)	5.62 (2.82)	9.71 (3.36)	11.05 (7.15)	11.05 (7.15)	9.81 (3.66)	12.48 (5.26)
goh_respiratory	7.86 (6.45)	7.50 (10.00)	5.36 (6.59)	2.50 (5.00)	10.71 (10.53)	15.71 (10.19)	17.86 (5.87)	7.50 (10.00)	10.00 (12.25)	10.36 (5.22)	7.86 (10.20)
goh_skeletal	10.77 (6.15)	3.08 (3.77)	9.23 (3.08)	6.15 (3.08)	7.69 (0.00)	4.62 (3.77)	4.62 (3.77)	7.69 (6.88)	7.69 (6.88)	10.77 (3.77)	9.23 (7.54)
omim_adrenoleukodystrophy	90.00 (20.00)	90.00 (20.00)	60.00 (48.99)	90.00 (20.00)	80.00 (24.49)	40.00 (37.42)	80.00 (24.49)	90.00 (20.00)	90.00 (20.00)	90.00 (20.00)	90.00 (20.00)
omim_aids	20.00 (40.00)	20.00 (40.00)	0.00 (0.00)	0.00 (0.00)	0.00 (0.00)	0.00 (0.00)	0.00 (0.00)	20.00 (40.00)	20.00 (40.00)	0.00 (0.00)	20.00 (40.00)
omim_alzheimer	5.00 (10.00)	5.00 (10.00)	33.33 (22.97)	21.67 (11.30)	10.00 (20.00)	5.00 (10.00)	10.00 (12.25)	26.67 (16.16)	26.67 (16.16)	20.00 (18.71)	5.00 (10.00)
omim_amyloidosis	10.00 (20.00)	20.00 (24.49)	20.00 (24.49)	50.00 (31.62)	0.00 (0.00)	10.00 (20.00)	20.00 (24.49)	20.00 (24.49)	20.00 (24.49)	20.00 (24.49)	10.00 (20.00)
omim_amyotrophic	15.00 (12.25)	10.00 (12.25)	0.00 (0.00)	10.00 (12.25)	10.00 (12.25)	10.00 (12.25)	10.00 (12.25)	10.00 (12.25)	10.00 (12.25)	10.00 (12.25)	15.00 (12.25)
omim_anemia	23.33 (29.06)	0.00 (0.00)	0.00 (0.00)	6.67 (13.33)	0.00 (0.00)	0.00 (0.00)	16.67 (21.08)	16.67 (21.08)	16.67 (21.08)	16.67 (21.08)	23.33 (29.06)
omim_arrhythmogenic	60.00 (20.00)	60.00 (20.00)	70.00 (24.49)	70.00 (24.49)	50.00 (31.62)	50.00 (31.62)	70.00 (24.49)	70.00 (24.49)	70.00 (24.49)	70.00 (24.49)	60.00 (20.00)
omim_asthma	0.00 (0.00)	5.00 (10.00)	18.33 (15.28)	18.33 (15.28)	0.00 (0.00)	6.67 (13.33)	18.33 (15.28)	11.67 (14.53)	18.33 (15.28)	11.67 (14.53)	0.00 (0.00)
omim_atrial	0.00 (0.00)	0.00 (0.00)	5.00 (10.00)	0.00 (0.00)	0.00 (0.00)	0.00 (0.00)	10.00 (12.25)	5.00 (10.00)	5.00 (10.00)	0.00 (0.00)	0.00 (0.00)
omim_autism	0.00 (0.00)	6.67 (13.33)	0.00 (0.00)	0.00 (0.00)	0.00 (0.00)	0.00 (0.00)	0.00 (0.00)	0.00 (0.00)	0.00 (0.00)	0.00 (0.00)	0.00 (0.00)
omim_autoimmune	0.00 (0.00)	6.67 (13.33)	6.67 (13.33)	30.00 (16.33)	16.67 (21.08)	16.67 (21.08)	30.00 (16.33)	30.00 (16.33)	30.00 (16.33)	30.00 (16.33)	16.67 (21.08)
omim_bardet_biedl	53.33 (26.67)	18.33 (15.28)	13.33 (16.33)	61.67 (14.53)	18.33 (15.28)	18.33 (15.28)	30.00 (16.33)	23.33 (20.00)	30.00 (16.33)	25.00 (12.91)	66.67 (29.81)
omim_blood	4.44 (8.89)	0.00 (0.00)	4.44 (5.44)	4.44 (5.44)	0.00 (0.00)	4.44 (8.89)	6.67 (8.89)	2.22 (4.44)	0.00 (0.00)	2.22 (4.44)	4.44 (8.89)
omim_brachydactyly	40.00 (37.42)	40.00 (37.42)	40.00 (37.42)	40.00 (37.42)	20.00 (24.49)	20.00 (24.49)	40.00 (37.42)	40.00 (37.42)	40.00 (37.42)	40.00 (37.42)	40.00 (37.42)
omim_breast	6.67 (13.33)	12.86 (12.38)	18.10 (17.41)	18.10 (13.85)	18.10 (17.41)	14.76 (15.68)	19.05 (11.57)	16.19 (10.58)	22.38 (12.74)	24.76 (15.47)	16.19 (10.58)
omim_cardiomyopathy	7.27 (6.80)	12.73 (12.33)	1.82 (3.64)	9.09 (9.96)	7.27 (6.80)	9.09 (5.75)	14.55 (9.27)	10.91 (8.91)	10.91 (8.91)	16.36 (8.91)	9.09 (9.96)
omim_cataract	30.00 (9.89)	45.33 (12.22)	3.33 (6.67)	36.67 (9.89)	36.67 (9.89)	40.67 (5.33)	48.67 (10.67)	33.33 (7.30)	37.33 (3.27)	44.67 (9.33)	41.33 (9.80)
omim_cerebral	28.33 (26.67)	38.33 (39.30)	0.00 (0.00)	28.33 (26.67)	38.33 (18.71)	45.00 (21.47)	33.33 (32.06)	28.33 (26.67)	28.33 (26.67)	33.33 (32.06)	43.33 (38.87)
omim_charcot_marie_tooth	2.50 (5.00)	10.36 (9.48)	0.00 (0.00)	2.50 (5.00)	11.07 (5.58)	13.57 (0.87)	23.93 (12.66)	2.50 (5.00)	2.50 (5.00)	7.86 (6.45)	10.71 (10.53)
omim_colon	0.00 (0.00)	0.00 (0.00)	0.00 (0.00)	20.00 (40.00)	10.00 (20.00)	10.00 (20.00)	10.00 (20.00)	0.00 (0.00)	0.00 (0.00)	10.00 (20.00)	0.00 (0.00)
omim_colorectal	7.86 (6.45)	15.36 (9.29)	18.57 (6.83)	31.79 (10.68)	23.93 (10.81)	26.43 (9.20)	38.93 (13.19)	17.86 (9.85)	17.86 (9.85)	28.93 (4.57)	17.86 (12.63)
omim_combined	17.00 (15.36)	12.00 (16.00)	4.00 (8.00)	16.00 (19.60)	12.00 (16.00)	12.00 (16.00)	16.00 (19.60)	12.00 (16.00)	12.00 (16.00)	16.00 (19.60)	21.00 (18.00)
omim_cone_rod	33.00 (15.36)	29.00 (9.17)	4.00 (8.00)	34.00 (17.44)	25.00 (7.75)	25.00 (7.75)	42.00 (13.27)	17.00 (15.36)	21.00 (12.81)	29.00 (9.17)	41.00 (16.85)
omim_congenital	32.00 (24.00)	32.00 (24.00)	12.00 (16.00)	32.00 (24.00)	28.00 (20.40)	28.00 (20.40)	32.00 (24.00)	28.00 (27.13)	32.00 (24.00)	32.00 (24.00)	32.00 (24.00)
omim_coronary	11.67 (14.53)	11.67 (14.53)	0.00 (0.00)	0.00 (0.00)	0.00 (0.00)	0.00 (0.00)	11.67 (14.53)	5.00 (10.00)	5.00 (10.00)	5.00 (10.00)	11.67 (14.53)
omim_deafness	3.64 (4.45)	9.64 (6.34)	2.00 (4.00)	7.64 (3.84)	5.64 (4.61)	5.64 (4.61)	7.45 (6.86)	3.64 (4.45)	5.64 (4.61)	5.64 (4.61)	5.64 (4.61)
omim_dementia	10.00 (20.00)	20.00 (24.49)	46.67 (32.32)	66.67 (42.16)	26.67 (22.61)	20.00 (24.49)	76.67 (29.06)	46.67 (32.32)	46.67 (32.32)	56.67 (38.87)	10.00 (20.00)
omim_diabetes	1.67 (3.33)	10.45 (8.08)	9.09 (5.75)	5.45 (4.45)	3.64 (4.45)	5.45 (4.45)	17.88 (9.98)	8.79 (5.28)	12.42 (4.11)	5.30 (4.34)	3.48 (4.27)
omim_diamond_blackfan	20.00 (24.49)	0.00 (0.00)	60.00 (37.42)	60.00 (37.42)	10.00 (20.00)	10.00 (20.00)	60.00 (37.42)	60.00 (37.42)	60.00 (37.42)	60.00 (37.42)	70.00 (24.49)
omim_dystonia	0.00 (0.00)	0.00 (0.00)	13.33 (16.33)	6.67 (13.33)	6.67 (13.33)	6.67 (13.33)	6.67 (13.33)	13.33 (16.33)	13.33 (16.33)	13.33 (16.33)	0.00 (0.00)
omim_ectodermal	23.33 (20.00)	23.33 (20.00)	20.00 (26.67)	30.00 (26.67)	10.00 (20.00)	10.00 (20.00)	30.00 (16.33)	36.67 (22.11)	36.67 (22.11)	36.67 (22.11)	23.33 (20.00)
omim_epidermolysis	41.67 (25.82)	56.67 (28.58)	66.67 (24.15)	76.67 (12.25)	50.00 (20.41)	56.67 (19.29)	76.67 (12.25)	71.67 (16.33)	76.67 (12.25)	76.67 (12.25)	46.67 (29.15)
omim_epilepsy	25.00 (7.75)	25.00 (7.75)	21.00 (2.00)	25.00 (7.75)	25.00 (7.75)	21.00 (12.81)	25.00 (7.75)	25.00 (7.75)	25.00 (7.75)	25.00 (7.75)	25.00 (7.75)
omim_epileptic	0.00 (0.00)	0.00 (0.00)	0.00 (0.00)	0.00 (0.00)	0.00 (0.00)	0.00 (0.00)	0.00 (0.00)	0.00 (0.00)	0.00 (0.00)	0.00 (0.00)	0.00 (0.00)
omim_epiphyseal	70.00 (40.00)	70.00 (40.00)	60.00 (37.42)	70.00 (40.00)	10.00 (20.00)	10.00 (20.00)	60.00 (37.42)	70.00 (40.00)	70.00 (40.00)	70.00 (40.00)	70.00 (40.00)
omim_esophageal	0.00 (0.00)	0.00 (0.00)	0.00 (0.00)	0.00 (0.00)	6.67 (13.33)	0.00 (0.00)	0.00 (0.00)	0.00 (0.00)	0.00 (0.00)	0.00 (0.00)	0.00 (0.00)
omim_factor	66.67 (21.08)	80.00 (16.33)	66.67 (29.81)	73.33 (24.94)	40.00 (38.87)	53.33 (40.00)	66.67 (29.81)	80.00 (16.33)	80.00 (16.33)	80.00 (16.33)	80.00 (16.33)
omim_fanconi	40.00 (13.78)	59.00 (9.17)	59.00 (15.62)	59.00 (15.62)	55.00 (26.65)	55.00 (26.65)	64.00 (15.94)	64.00 (15.94)	64.00 (15.94)	64.00 (15.94)	59.00 (9.17)
omim_gastric	4.00 (8.00)	0.00 (0.00)	0.00 (0.00)	4.00 (8.00)	0.00 (0.00)	0.00 (0.00)	0.00 (0.00)	0.00 (0.00)	0.00 (0.00)	0.00 (0.00)	4.00 (8.00)
omim_glomerulosclerosis	0.00 (0.00)	0.00 (0.00)	0.00 (0.00)	0.00 (0.00)	0.00 (0.00)	0.00 (0.00)	0.00 (0.00)	0.00 (0.00)	0.00 (0.00)	0.00 (0.00)	0.00 (0.00)
omim_glycogen	33.33 (21.08)	33.33 (21.08)	13.33 (16.33)	33.33 (21.08)	20.00 (16.33)	13.33 (16.33)	20.00 (16.33)	33.33 (21.08)	33.33 (21.08)	26.67 (24.94)	33.33 (21.08)
omim_hemolytic	36.00 (14.97)	36.00 (14.97)	32.00 (16.00)	36.00 (14.97)	8.00 (9.80)	8.00 (9.80)	32.00 (16.00)	36.00 (14.97)	36.00 (14.97)	36.00 (14.97)	36.00 (14.97)
omim_hemophagocytic	0.00 (0.00)	0.00 (0.00)	30.00 (24.49)	30.00 (24.49)	0.00 (0.00)	0.00 (0.00)	30.00 (24.49)	30.00 (24.49)	30.00 (24.49)	20.00 (24.49)	0.00 (0.00)
omim_hepatocellular	0.00 (0.00)	0.00 (0.00)	10.00 (20.00)	20.00 (40.00)	50.00 (44.72)	30.00 (40.00)	30.00 (40.00)	0.00 (0.00)	0.00 (0.00)	30.00 (40.00)	0.00 (0.00)
omim_high	20.00 (24.49)	20.00 (24.49)	20.00 (24.49)	40.00 (37.42)	10.00 (20.00)	10.00 (20.00)	20.00 (24.49)	30.00 (24.49)	30.00 (24.49)	20.00 (24.49)	30.00 (24.49)
omim_hypercholesterolemia	6.67 (13.33)	6.67 (13.33)	16.67 (21.08)	23.33 (20.00)	6.67 (13.33)	6.67 (13.33)	23.33 (20.00)	0.00 (0.00)	6.67 (13.33)	6.67 (13.33)	6.67 (13.33)
omim_hypertension	0.00 (0.00)	30.00 (26.67)	23.33 (20.00)	23.33 (20.00)	10.00 (20.00)	10.00 (20.00)	23.33 (20.00)	23.33 (20.00)	23.33 (20.00)	23.33 (20.00)	23.33 (20.00)
omim_ichthyosis	0.00 (0.00)	10.00 (20.00)	13.33 (16.33)	6.67 (13.33)	0.00 (0.00)	0.00 (0.00)	13.33 (16.33)	0.00 (0.00)	0.00 (0.00)	0.00 (0.00)	0.00 (0.00)
omim_immunodeficiency	7.33 (9.04)	4.00 (8.00)	10.00 (13.33)	25.33 (12.40)	7.33 (9.04)	7.33 (9.04)	14.00 (12.72)	18.00 (10.67)	18.00 (10.67)	14.00 (12.72)	21.33 (16.14)
omim_keratosis	40.00 (48.99)	30.00 (40.00)	10.00 (20.00)	30.00 (24.49)	10.00 (20.00)	0.00 (0.00)	30.00 (24.49)	40.00 (37.42)	40.00 (37.42)	30.00 (24.49)	50.00 (44.72)
omim_leigh	43.33 (32.66)	43.33 (32.66)	23.33 (20.00)	43.33 (32.66)	36.67 (22.11)	36.67 (22.11)	43.33 (32.66)	43.33 (32.66)	43.33 (32.66)	43.33 (32.66)	43.33 (32.66)
omim_leukemia	2.58 (3.17)	3.83 (3.13)	7.83 (2.76)	7.67 (6.09)	6.42 (3.96)	6.33 (6.85)	6.33 (5.59)	3.83 (3.13)	3.83 (3.13)	10.25 (6.40)	3.83 (3.13)
omim_long	26.67 (24.94)	33.33 (29.81)	31.67 (36.67)	45.00 (34.80)	20.00 (16.33)	20.00 (16.33)	45.00 (34.80)	45.00 (34.80)	45.00 (34.80)	40.00 (38.87)	26.67 (24.94)
omim_lung	6.67 (13.33)	0.00 (0.00)	0.00 (0.00)	6.67 (13.33)	0.00 (0.00)	0.00 (0.00)	0.00 (0.00)	6.67 (13.33)	6.67 (13.33)	6.67 (13.33)	6.67 (13.33)
omim_lymphoma	0.00 (0.00)	0.00 (0.00)	0.00 (0.00)	0.00 (0.00)	6.67 (13.33)	0.00 (0.00)	0.00 (0.00)	0.00 (0.00)	0.00 (0.00)	0.00 (0.00)	0.00 (0.00)
omim_macular	28.00 (14.24)	38.00 (16.28)	21.33 (14.08)	38.00 (6.53)	16.67 (18.26)	16.67 (18.26)	41.33 (7.48)	38.00 (16.28)	38.00 (16.28)	38.00 (6.53)	41.33 (12.93)
omim_malaria	5.00 (10.00)	5.00 (10.00)	5.00 (10.00)	10.00 (12.25)	0.00 (0.00)	0.00 (0.00)	10.00 (12.25)	5.00 (10.00)	5.00 (10.00)	5.00 (10.00)	10.00 (12.25)
omim_melanoma	0.00 (0.00)	0.00 (0.00)	20.00 (24.49)	20.00 (24.49)	0.00 (0.00)	0.00 (0.00)	10.00 (20.00)	20.00 (24.49)	20.00 (24.49)	20.00 (24.49)	0.00 (0.00)
omim_mental	1.43 (2.86)	2.86 (3.50)	9.90 (3.58)	8.48 (2.91)	1.33 (2.67)	1.33 (2.67)	1.33 (2.67)	7.05 (6.39)	8.48 (5.37)	4.19 (3.43)	4.19 (5.67)
omim_microcephaly	0.00 (0.00)	0.00 (0.00)	0.00 (0.00)	0.00 (0.00)	0.00 (0.00)	0.00 (0.00)	0.00 (0.00)	0.00 (0.00)	0.00 (0.00)	0.00 (0.00)	0.00 (0.00)
omim_microphthalmia	40.00 (22.61)	13.33 (16.33)	0.00 (0.00)	13.33 (16.33)	6.67 (13.33)	13.33 (16.33)	13.33 (16.33)	6.67 (13.33)	13.33 (16.33)	13.33 (16.33)	30.00 (16.33)
omim_microvascular	0.00 (0.00)	0.00 (0.00)	0.00 (0.00)	0.00 (0.00)	0.00 (0.00)	0.00 (0.00)	0.00 (0.00)	0.00 (0.00)	0.00 (0.00)	0.00 (0.00)	0.00 (0.00)
omim_mitochondrial	30.00 (18.71)	30.00 (18.71)	10.00 (12.25)	30.00 (18.71)	20.00 (10.00)	20.00 (10.00)	30.00 (18.71)	25.00 (15.81)	30.00 (18.71)	30.00 (18.71)	30.00 (18.71)
omim_multiple	39.00 (14.97)	22.00 (12.88)	0.00 (0.00)	31.00 (12.00)	23.00 (16.00)	27.00 (17.20)	32.00 (19.39)	18.00 (9.27)	18.00 (9.27)	18.00 (9.27)	48.00 (7.48)
omim_muscular	40.00 (33.91)	56.67 (27.59)	26.67 (3.33)	51.67 (13.33)	26.67 (16.16)	26.67 (16.16)	41.67 (19.00)	56.67 (27.59)	56.67 (27.59)	36.67 (11.30)	56.67 (22.61)
omim_myasthenic	70.00 (24.49)	60.00 (20.00)	50.00 (31.62)	70.00 (24.49)	70.00 (24.49)	60.00 (20.00)	70.00 (24.49)	70.00 (24.49)	70.00 (24.49)	70.00 (24.49)	70.00 (24.49)
omim_myocardial	16.67 (21.08)	23.33 (20.00)	6.67 (13.33)	10.00 (20.00)	13.33 (16.33)	20.00 (26.67)	30.00 (26.67)	16.67 (21.08)	16.67 (21.08)	23.33 (20.00)	23.33 (20.00)
omim_myopathy	8.00 (9.80)	8.00 (9.80)	20.00 (21.91)	12.00 (9.80)	4.00 (8.00)	8.00 (9.80)	12.00 (9.80)	20.00 (21.91)	20.00 (21.91)	8.00 (9.80)	8.00 (9.80)
omim_neuropathy	0.00 (0.00)	0.00 (0.00)	0.00 (0.00)	9.00 (11.14)	5.00 (10.00)	5.00 (10.00)	9.00 (11.14)	0.00 (0.00)	0.00 (0.00)	0.00 (0.00)	0.00 (0.00)
omim_noonan	0.00 (0.00)	0.00 (0.00)	6.67 (13.33)	33.33 (29.81)	20.00 (26.67)	13.33 (26.67)	6.67 (13.33)	6.67 (13.33)	6.67 (13.33)	20.00 (26.67)	0.00 (0.00)
omim_obesity	32.00 (16.00)	28.00 (20.40)	36.00 (14.97)	40.00 (17.89)	32.00 (20.40)	24.00 (14.97)	40.00 (12.65)	32.00 (16.00)	32.00 (16.00)	28.00 (20.40)	28.00 (20.40)
omim_osteopetrosis	0.00 (0.00)	0.00 (0.00)	20.00 (24.49)	20.00 (24.49)	0.00 (0.00)	0.00 (0.00)	20.00 (24.49)	20.00 (24.49)	20.00 (24.49)	20.00 (24.49)	0.00 (0.00)
omim_ovarian	4.00 (8.00)	8.00 (9.80)	0.00 (0.00)	8.00 (9.80)	24.00 (23.32)	20.00 (21.91)	12.00 (9.80)	4.00 (8.00)	8.00 (9.80)	20.00 (21.91)	8.00 (9.80)
omim_pancreatic	0.00 (0.00)	0.00 (0.00)	21.67 (19.44)	16.67 (21.08)	23.33 (20.00)	23.33 (20.00)	16.67 (21.08)	6.67 (13.33)	6.67 (13.33)	23.33 (20.00)	0.00 (0.00)
omim_parkinson	0.00 (0.00)	0.00 (0.00)	6.67 (13.33)	0.00 (0.00)	6.67 (13.33)	0.00 (0.00)	0.00 (0.00)	0.00 (0.00)	0.00 (0.00)	0.00 (0.00)	0.00 (0.00)
omim_pituitary	20.00 (24.49)	30.00 (24.49)	0.00 (0.00)	20.00 (24.49)	36.67 (37.12)	36.67 (37.12)	46.67 (32.32)	30.00 (24.49)	30.00 (24.49)	46.67 (32.32)	30.00 (24.49)
omim_prostate	6.19 (7.62)	2.86 (5.71)	9.52 (7.82)	9.05 (7.44)	6.19 (7.62)	6.19 (7.62)	6.19 (7.62)	2.86 (5.71)	6.19 (7.62)	6.19 (7.62)	2.86 (5.71)
omim_pulmonary	18.33 (15.28)	11.67 (14.53)	0.00 (0.00)	6.67 (13.33)	13.33 (16.33)	20.00 (26.67)	13.33 (16.33)	6.67 (13.33)	6.67 (13.33)	20.00 (26.67)	18.33 (15.28)
omim_renal	9.00 (11.14)	8.00 (16.00)	4.00 (8.00)	17.00 (15.36)	4.00 (8.00)	8.00 (9.80)	20.00 (21.91)	12.00 (16.00)	12.00 (16.00)	12.00 (9.80)	9.00 (11.14)
omim_retinitis	23.33 (3.33)	18.33 (8.16)	3.33 (4.08)	20.00 (10.00)	13.33 (6.67)	15.00 (6.24)	21.67 (10.00)	11.67 (4.08)	15.00 (6.24)	15.00 (6.24)	21.67 (6.67)
omim_rheumatoid	30.00 (18.71)	34.00 (13.19)	5.00 (10.00)	24.00 (22.45)	4.00 (8.00)	4.00 (8.00)	19.00 (9.70)	29.00 (10.68)	29.00 (10.68)	24.00 (15.94)	34.00 (13.19)
omim_schizophrenia	0.00 (0.00)	0.00 (0.00)	0.00 (0.00)	0.00 (0.00)	16.67 (21.08)	16.67 (21.08)	0.00 (0.00)	0.00 (0.00)	0.00 (0.00)	0.00 (0.00)	0.00 (0.00)
omim_severe	20.00 (16.33)	33.33 (29.81)	33.33 (29.81)	46.67 (33.99)	13.33 (16.33)	20.00 (16.33)	40.00 (24.94)	33.33 (29.81)	33.33 (29.81)	40.00 (24.94)	40.00 (24.94)
omim_short	6.67 (13.33)	0.00 (0.00)	0.00 (0.00)	10.00 (20.00)	0.00 (0.00)	0.00 (0.00)	0.00 (0.00)	0.00 (0.00)	0.00 (0.00)	0.00 (0.00)	6.67 (13.33)
omim_spastic	0.00 (0.00)	0.00 (0.00)	0.00 (0.00)	0.00 (0.00)	0.00 (0.00)	5.00 (10.00)	10.00 (12.25)	0.00 (0.00)	0.00 (0.00)	0.00 (0.00)	0.00 (0.00)
omim_spinocerebellar	0.00 (0.00)	0.00 (0.00)	3.33 (6.67)	0.00 (0.00)	5.71 (11.43)	2.86 (5.71)	0.00 (0.00)	0.00 (0.00)	0.00 (0.00)	2.86 (5.71)	0.00 (0.00)
omim_systemic	5.00 (10.00)	5.00 (10.00)	0.00 (0.00)	0.00 (0.00)	0.00 (0.00)	0.00 (0.00)	0.00 (0.00)	5.00 (10.00)	5.00 (10.00)	0.00 (0.00)	5.00 (10.00)
omim_thrombophilia	55.00 (10.00)	50.00 (15.81)	40.00 (20.00)	60.00 (12.25)	25.00 (0.00)	20.00 (10.00)	45.00 (18.71)	50.00 (15.81)	50.00 (15.81)	45.00 (18.71)	60.00 (12.25)
omim_thyroid	0.00 (0.00)	0.00 (0.00)	3.33 (6.67)	3.33 (6.67)	4.00 (8.00)	4.00 (8.00)	7.33 (9.04)	0.00 (0.00)	0.00 (0.00)	0.00 (0.00)	7.33 (9.04)
omim_usher	70.00 (40.00)	70.00 (40.00)	50.00 (44.72)	70.00 (40.00)	70.00 (40.00)	70.00 (40.00)	70.00 (40.00)	70.00 (40.00)	70.00 (40.00)	70.00 (40.00)	70.00 (40.00)
omim_xeroderma	80.00 (40.00)	80.00 (24.49)	56.67 (22.61)	80.00 (24.49)	50.00 (31.62)	56.67 (22.61)	56.67 (22.61)	80.00 (24.49)	80.00 (24.49)	80.00 (24.49)	80.00 (24.49)
omim_zellweger	95.00 (10.00)	95.00 (10.00)	76.67 (20.00)	95.00 (10.00)	75.00 (12.91)	70.00 (16.33)	88.33 (14.53)	95.00 (10.00)	95.00 (10.00)	88.33 (14.53)	95.00 (10.00)
